1  
2  
3  
4  
5  
6  
7  
8  
9  
10  
11  
12  
13  
14  
15  
16  
17  
18  
19  
20  
21  
22  
23  
24  
25  
26  
27

**Interleukin-10 and Small Molecule SHIP1 Allosteric Regulators Trigger Anti-Inflammatory Effects  
Through SHIP1/STAT3 Complexes**

Thomas C. Chamberlain<sup>1,3,4\*</sup>, Sylvia T. Cheung<sup>1,3,4\*</sup>, Jeff S.J. Yoon<sup>1,3,4\*</sup>, Andrew Ming-Lum<sup>1,3</sup>, Bernd R. Gardill<sup>4</sup>,  
Soroush Shakibakho<sup>1,3</sup>, Edis Dzananovic<sup>8</sup>, Fuqiang Ban<sup>6</sup>, Abrar Samiea<sup>1,3</sup>, Kamaldeep Jawanda<sup>1,3</sup>, John  
Priatel<sup>5</sup>, Gerald Krystal<sup>2,5</sup>, Christopher J. Ong<sup>1,3,6</sup>, Artem Cherkasov<sup>6</sup>, Raymond J. Andersen<sup>7</sup>, Sean A.  
McKenna<sup>8</sup>, Filip Van Petegem<sup>4</sup> and Alice L-F Mui<sup>1,3,4</sup>

<sup>1</sup>Immunity and Infection Research Centre, Vancouver Coastal Health Research Institute, Vancouver, Canada, V6H 3Z6, <sup>2</sup>British Columbia Cancer Research Centre, Vancouver, Canada, V5Z 1L3 and the  
Departments of <sup>3</sup>Surgery, <sup>4</sup>Biochemistry and Molecular Biology, <sup>5</sup>Pathology and Laboratory Medicine,  
<sup>6</sup>Urological Sciences, <sup>7</sup>Chemistry, University of British Columbia, Vancouver, Canada. <sup>8</sup>Department of  
Chemistry, University of Manitoba, Winnipeg, Canada

\*TCC, STC and JSJY contributed equally to this study.

Lead Author: Alice L-F Mui

Address: Jack Bell Research Centre, 2660 Oak Street, Vancouver BC, V6H 3Z6

Tel: (604)875-4111 (Ext. 62242); Fax: (604)875-4497

E-Mail: [alice.mui@ubc.ca](mailto:alice.mui@ubc.ca)

## 28 **ABSTRACT**

29 The anti-inflammatory actions of interleukin-10 (IL10) are thought to be mediated primarily by the STAT3  
30 transcription factor, but pro-inflammatory cytokines such as interleukin-6 (IL6) also act through STAT3.  
31 We now report that IL10, but not IL6 signaling, induces formation of a complex between STAT3 and the  
32 inositol polyphosphate-5-phosphatase SHIP1 in macrophages. Both SHIP1 and STAT3 translocate to the  
33 nucleus in macrophages. Remarkably, sesquiterpenes of the Pelorol family we previously described as  
34 allosteric activators of SHIP1 phosphatase activity, could induce SHIP1/STAT3 complex formation in cells,  
35 and mimic the anti-inflammatory action of IL10 in a mouse model of colitis. Using crystallography and  
36 docking studies we identified a drug-binding pocket in SHIP1. Our studies reveal new mechanisms of  
37 action for both STAT3 and SHIP1, and provide a rationale for use of allosteric SHIP1-activating compounds  
38 which mimic the beneficial anti-inflammatory actions of IL10.

39

## 40 **INTRODUCTION**

41 The prevalence of inflammatory bowel disease (IBD) in North America is 505/100,000 persons (Ulcerative  
42 Colitis) and 322/100,000 person (Crohn's Disease) and increasing (Sairenji et al., 2017). Many factors  
43 contribute to the development of IBD, but genome wide association studies (Verstockt et al., 2018) and  
44 clinical data (Engelhardt and Grimbacher, 2014, Glocker et al., 2009, Glocker et al., 2011, Louis et al., 2009)  
45 show the anti-inflammatory actions of interleukin-10 (IL10) (Friedrich et al., 2019, Ouyang and O'Garra,  
46 2019, Ouyang et al., 2011) are important in maintaining proper immune homeostasis. IL10 deficient mice  
47 develop colitis similar to human IBD (Kuhn et al., 1993, Shouval et al., 2014b) and the key target of IL10 is  
48 the macrophage (Friedrich et al., 2019, Shouval et al., 2014b, Zigmund et al., 2014). In humans,  
49 polymorphisms in the IL10 gene are associated with ulcerative colitis (Louis et al., 2009) and homozygous  
50 loss-of-function mutations in the IL10 receptor subunits result in early onset colitis (Engelhardt and  
51 Grimbacher, 2014, Glocker et al., 2009, Glocker et al., 2011). Therefore, understanding the mechanism  
52 by which IL10 exerts its action on target cells may provide insight into the development of therapeutics  
53 to treat inflammatory disease (Kumar et al., 2017).

54 IL10 maintains colon mucosal immune homeostasis mainly by inhibiting macrophage production of  
55 inflammatory mediators such as tumor necrosis factor  $\alpha$  (TNF $\alpha$ ) and IL1 $\alpha$  elicited by inflammatory stimuli  
56 (Friedrich et al., 2019, Ouyang and O'Garra, 2019, Ouyang et al., 2011, Shouval et al., 2014a, Zigmund et  
57 al., 2014, Iyer and Cheng, 2012). In the classic model of IL10 receptor signaling, binding of IL10 to its  
58 receptor induces activation of the Jak1 and Tyk2 tyrosine kinase, tyrosine phosphorylation of the STAT3

59 transcription factor and expression of STAT3-regulated genes (Hutchins et al., 2013, Murray, 2006b,  
60 Murray, 2006a). STAT3 activation is widely thought to be sufficient to mediate all the anti-inflammatory  
61 actions of IL10 (El Kasmi et al., 2006, Murray, 2005, Murray, 2006b, Murray, 2006a, Weaver et al., 2007,  
62 Hutchins et al., 2012). In support of this, a myeloid specific STAT3<sup>-/-</sup> mouse develops colitis (Takeda et al.,  
63 1999) much like an IL10<sup>-/-</sup> mouse (Kuhn et al., 1993, Zigmond et al., 2014). However, STAT3 becomes  
64 tyrosine phosphorylated and activated by many stimuli including the pro-inflammatory cytokine  
65 interleukin-6 (IL6) (Garbers et al., 2015), so STAT3 activation must differ downstream of IL10 and IL6  
66 signaling in order to mediate their opposing actions.

67 The SHIP1 phosphatidylinositol 3,4,5-trisphosphate 5-phosphatase is a cytoplasmic protein expressed  
68 predominantly in hematopoietic cells (Hibbs et al., 2018, Fernandes, 2013 #1400, Huber et al., 1999,  
69 Krystal, 2000, Pauls and Marshall, 2017). In response to extracellular signals, SHIP1 can be recruited to  
70 the cell membrane and one of its actions can be to turn off phosphoinositide 3-kinase (PI3K) signaling  
71 (Brown et al., 2010) by dephosphorylating the PI3K product PIP<sub>3</sub> into PI(3,4)P<sub>2</sub> (Fernandes et al., 2013,  
72 Huber et al., 1999, Krystal, 2000, Pauls and Marshall, 2017). We have shown that SHIP1 phosphatase  
73 activity is allosterically activated by its product PI(3,4)P<sub>2</sub> and that small molecules of the pelorol family  
74 (ZPR-MN100 and ZPR-151) also allosterically enhance SHIP1 phosphatase activity (Meimetis et al., 2012,  
75 Ong et al., 2007). These data suggest that stimulating SHIP1 phosphatase activity with small molecule  
76 SHIP1 activators could be used to treat inflammatory diseases caused by inappropriately sustained PI3K  
77 production of PI(3,4)P<sub>2</sub>.

78 However, in addition to its enzymatic function in hydrolyzing PIP<sub>3</sub>, SHIP1 can also act as a docking protein  
79 for assembly of signaling complexes (Pauls and Marshall, 2017). We previously showed that IL10R  
80 signaling requires SHIP1 to inhibit TNF $\alpha$  translation (Chan et al., 2012) but whether SHIP1 and STAT3  
81 worked independently or together was not determined. We now report that a SHIP1 protein containing  
82 point mutations, which inactivates its phosphatase activity, could still mediate the anti-inflammatory  
83 action of IL10, and that SHIP1 and STAT3 associate with each other in response to IL10. Furthermore,  
84 small molecule allosteric activators of SHIP1 can by themselves induce SHIP1/STAT3 complex formation  
85 and inhibit inflammation in a mouse model of colitis.

86  
87 These data suggest that SHIP1 agonists can be used to elicit the beneficial anti-inflammatory action of  
88 IL10 by inducing a conformational change in SHIP1 that allows SHIP1/STAT3 complex formation.

89 Furthermore, disease indications in which loss of normal IL10 function has been implicated, are ones  
90 which might benefit most from use of SHIP1 agonists.

91

## 92 **RESULTS**

### 93 **IL10 requires both SHIP1 and STAT3 to inhibit macrophage production of TNF $\alpha$**

94 A role for STAT3 in mediating IL10 inhibition of TNF $\alpha$  *in vivo* was first described by Takeda *et al* (Takeda  
95 *et al.*, 1999). They found that LPS administration to mice with a myeloid specific knockdown of STAT3  
96 produced more TNF $\alpha$  than wild-type mice, concluding endogenous IL10 is unable to counteract LPS  
97 signaling in the STAT3<sup>-/-</sup> mice. However, closer examination of their data showed that while TNF $\alpha$  levels  
98 remain high post LPS administration in the IL10<sup>-/-</sup> mice (Berg *et al.*, 1995), TNF $\alpha$  levels drop in STAT3<sup>-/-</sup>  
99 mice as endogenous levels of IL10 rise (Takeda *et al.*, Fig 2B). This implies that a protein other than STAT3  
100 might contribute to IL10 action. Our previous cell culture-based studies suggested that SHIP1 participates  
101 in IL10 action (Chan *et al.*, 2012, Cheung *et al.*, 2013, Samiea *et al.*, 2020). We now looked *in vivo* at the  
102 ability of IL10 to inhibit LPS-induced inflammatory cytokine expression (**Figure 1A**) in SHIP1<sup>+/+</sup> and SHIP1<sup>-/-</sup>  
103 mice, and found IL10 inhibited TNF $\alpha$  in SHIP1<sup>+/+</sup> but not SHIP1<sup>-/-</sup> mice. We have previously shown that  
104 SHIP1 phosphatase activity is allosterically stimulated by its product PI(3,4)P<sub>2</sub> (Ong *et al.*, 2007). We  
105 synthesized a small molecule allosteric regulator, **ZPR-MN100** (previously called AQX-MN100 (Ong *et al.*,  
106 2007)) (**Figure 7A**) which binds to the same SHIP1 C2 domain as PI(3,4)P<sub>2</sub> and increases SHIP1 functional  
107 activity (Ong *et al.*, 2007). We found that ZPR-MN100 inhibited LPS-induced TNF $\alpha$  in SHIP1<sup>+/+</sup> but not  
108 SHIP1<sup>-/-</sup> mice, suggesting that these compounds can mimic anti-inflammatory properties of IL10 and is  
109 indeed specific for SHIP1 (**Figure 1B**).

110 SHIP1 and STAT3 could be acting independently or together in mediating IL10 action. To help distinguish  
111 between these two possibilities we used a continuous flow cell culture system that allows us to assess the  
112 kinetics of TNF $\alpha$  production in SHIP1 and STAT3 wild-type and knockout bone marrow derived  
113 macrophages (BMDM). LPS stimulates two peaks of TNF $\alpha$  expression, one at around 1 hour and another  
114 at 3 hours (**Figure 1C**). IL10 reduces TNF $\alpha$  levels in both SHIP1<sup>+/+</sup> and STAT3<sup>+/+</sup> cells, but is completely  
115 impaired in inhibiting the 1-hour peak in both STAT3<sup>-/-</sup> and SHIP1<sup>-/-</sup> cells, and partly impaired in inhibiting  
116 the 3-hour peak in both KO BMDM. The identical patterns of non-responsiveness suggest that SHIP1 and  
117 STAT3 cooperate.

### 118 **IL10 induces physical association of SHIP1 and STAT3 in macrophages**



119 Our finding that SHIP1 and STAT3 work together is unprecedented. Both proteins reside in the cytoplasm  
120 in resting cells and are recruited to the cell membrane in response to extracellular stimuli but through  
121 distinct mechanisms. STAT3 functions mostly as a transcription factor (Matsuda et al., 2015) and SHIP1 is  
122 best known for its lipid phosphatase activity (Pauls and Marshall, 2017). However, SHIP1 can also act as  
123 a docking or adaptor protein for assembly of signaling complexes (Pauls and Marshall, 2017). Indeed, we  
124 found that a version of SHIP1 with minimal phosphatase activity (3PT) (An et al., 2005) can mediate the  
125 inhibitory effect of IL10 on LPS-stimulated TNF $\alpha$  production (Figure 2A), so we examined whether SHIP1  
126 might serve an adaptor function in IL10 signaling and associate with STAT3 in response to IL10. Figure 2B  
127 shows that treatment of cells with IL10 resulted in co-precipitation of SHIP1 with STAT3. IL6 failed to  
128 induce STAT3 association with SHIP1, even though STAT3 becomes tyrosine phosphorylated to the same  
129 extent as in response to IL10. Remarkably, treatment of cells with the small molecule SHIP1 allosteric  
130 regulator ZPR-151 (previously called 28-HCl (Meimetis et al., 2012)), a more water soluble derivative of  
131 ZPR-MN100 (Figure 7A), is sufficient to induce association of SHIP1 and STAT3 (Figure 2B). The ability of  
132 ZPR-151 to induce association of SHIP1 and STAT3 suggests the binding of ZPR-151 may induce a  
133 conformational change that can alter SHIP1's association with other proteins. To see if the SHIP1/STAT3  
134 interaction occurs in intact cells, we generated Clover-SHIP1 and mRuby2-STAT3 fusion protein constructs  
135 and transduced them into J17 SHIP1<sup>-/-</sup> cells for FRET analysis. Figure 2C shows that stimulating Clover-  
136 SHIP1/mRuby2-STAT3 cells with IL10 or ZPR-151, but not IL6, increases the Clover-mRuby2 FRET signal  
137 suggesting SHIP1 and STAT3 interact *in vivo*.

138 Both SHIP1 and STAT3 have SH2 domains and both have been reported to become phosphorylated on  
139 tyrosine residues, so the complex formation might be mediated through a phospho-tyrosine/SH2  
140 interaction. Since Figure 2B shows that STAT3 does not have to be phosphorylated to bind to SHIP1 (see  
141 ZPR-151 lane), we looked at whether tyrosine residues on SHIP1 might become phosphorylated to interact  
142 with the STAT3 SH2 domain. Four tyrosine residues in SHIP1 exist in the context of a STAT3 SH2 domain  
143 recognition sequence. We constructed SHIP1 mutants in which each of these residues are substituted  
144 with phenylalanine, expressed them in the J17 SHIP1<sup>-/-</sup> macrophage cell line and tested the ability of IL10  
145 to inhibit TNF $\alpha$  expression (Figure 3A) in these cells. Cells expressing the Y190F mutant behaved like a  
146 SHIP1<sup>-/-</sup> (Figure 3A) cell. The Y190F mutant ability to interact with STAT3 was reduced 2-fold in response  
147 to IL10 and ZPR-151 (Figure 3B and 3C), suggesting that part of the SHIP1 interaction with STAT3 required  
148 phosphorylation of SHIP1 Y190.

149

150 We also looked at the subcellular localization of SHIP1 and STAT3 in primary cells. Wild-type, SHIP1<sup>-/-</sup> or  
151 STAT3<sup>-/-</sup> peritoneal macrophages were stimulated with IL10 or ZPR-151 and stained with antibodies  
152 against SHIP1 or STAT3. **Figure 4A and Figure 4B** shows IL10 or ZPR-151 induced membrane association  
153 of both SHIP1 and STAT3 at 2 min in wild-type cells. SHIP1 does not translocate in STAT3<sup>-/-</sup> cells, and STAT3  
154 does not translocate in SHIP1<sup>-/-</sup> cells (**Figure 4B**). At 20 min, both SHIP1 and STAT3 are found in the nucleus  
155 in wild-type cells, and translocation required cells to express both STAT3 and SHIP1. Thus, ZPR-151 can  
156 mimic IL10 in with respect to SHIP1 and STAT3 translocations.

### 157 **SHIP1 undergoes a conformational change upon allosteric regulator binding**

158 To better understand the interaction of the small molecule allosteric regulators with SHIP1, we produced  
159 for X-ray crystallography, truncated SHIP1 proteins which contains the minimal region of SHIP1 needed  
160 for allosteric regulated phosphatase activity (**Figure 5**). Full length SHIP1 cannot be expressed at sufficient  
161 quantity for crystallography so we first defined the minimal region of SHIP1 needed for allosteric  
162 activation. We had previously shown the C2 domain binds the SHIP1 allosteric regulators (PI(3,4)P<sub>2</sub>, ZPR-  
163 MN100), and that the PH-R domain N-terminal to the phosphatase domain might be involved ([Ong et al.,](#)  
164 [2007](#)). So, we expressed full length SHIP1 (which could only be produced in mammalian 293T cells), **PPAC**  
165 (which contains the PH-R-phosphatase-C2 domains, and can be expressed in both 293T cells and *E. coli*),  
166 and **PAC1/PAC2** (which contain the phosphatase-C2 domains, and can be expressed in *E. coli*) proteins  
167 (**Figure 5A**). We examined their enzyme (phosphatase) kinetic properties and ability to become activated  
168 by ZPR-MN100. We found that 293T and *E. coli* derived PPAC had the same enzymatic properties (**Figure**  
169 **5B**), and that all four proteins (full length SHIP1, 293T derived PPAC, *E. coli* derived PPAC, and PAC2) could  
170 be activated by ZPR-MN100 (**Figure 5C**).

171  
172 Only PAC1 and PAC2 proteins could be expressed in amounts needed for structural studies so these were  
173 produced and put through screens for conditions to produce crystals of sufficient quality for structural  
174 determination. This included making surface entropy reduced ([Derewenda, 2004](#), [Goldschmidt et al.,](#)  
175 [2007](#)) versions called PAC1-cc and PAC2-cc where three glutamic acid residues in PAC1 and PAC2 were  
176 substituted with alanines. We solved the structure for several PAC1-cc and PAC2-cc crystals, and the data  
177 from a PAC2-cc crystal which diffracted at 1.6Å resolution is shown in **Figure 6A and Table S1**. We also  
178 used small angle X-ray scattering data (SAXS) to generate models of PAC1 with and without ZPR-MN100.  
179 The solution conformation of unliganded PAC1 determined by SAXS confirms the X-ray crystal structure.

180 Furthermore, SAXS analysis showed that the binding of ZPR-MN100 to PAC1 results in a change in its  
181 overall conformation (**Figure 6B**).

182  
183 Using molecular modeling ([Ban et al., 2018](#)) we identified a potential binding pocket for ZPR-MN100/ZPR-  
184 151 in PAC2 (**Figure 6A**). Residue K681 in this pocket is predicted to be involved in binding ZPR-  
185 MN100/ZPR-151 so we generated the K681A point mutant of PAC2 and tested the ability of wild-type and  
186 PAC2-K681A to bind ZPR-151 using Biolayer Interferometry (BLI). As shown in **Figure 6C** (and **Figure S2**),  
187 substitution of K681A in the putative pocket impairs the ability of both ZPR-151 and PI(3,4)P<sub>2</sub> to bind to  
188 PAC2. We then looked at the effect of the K681A substitution on the ability of full length SHIP1 to mediate  
189 IL10 inhibition of macrophages. **Figure 6D** shows that IL10 inhibited TNF $\alpha$  production efficiently in cells  
190 expressing wild-type but not K681A SHIP1.

191  
192 In work done independently of the authors of this paper, Stenton *et al* described a molecule called AQX-  
193 1125 (structure in **Figure 7A**, later given the clinical trial name of Rosiptor) as a SHIP1 agonist ([Stenton et](#)  
194 [al., 2013a](#), [Stenton et al., 2013b](#)). However, AQX-1125/Rosiptor has marginal SHIP1 phosphatase  
195 enhancing activity ([Stenton et al., 2013b](#)), and displayed different enzyme kinetics properties ([Stenton et](#)  
196 [al., 2013b](#)) than we observed with ZPR-MN100 ([Ong et al., 2007](#)). Stenton *et al* looked at binding of  
197 tritiated AQX-1125/Rosiptor to SHIP1 protein using scintillation proximity assay but it is difficult to assess  
198 the significance of the ~300 cpm signal they observed. So we directly compared the ability of PI(3,4)P<sub>2</sub>,  
199 ZPR-151 and AQX-1125/Rosiptor to bind to SHIP1 in our BLI assay (**Figure 7B** and **Figure S2**). We found  
200 AQX-1125/Rosiptor binds very poorly to SHIP1 as compared to ZPR-151 or SHIP1's natural agonist  
201 PI(3,4)P<sub>2</sub>.

202  
203 **The small molecule SHIP1 allosteric regulator ZPR-MN100 alleviates inflammation in IL10<sup>-/-</sup> colitis**

204 To test whether small molecule SHIP1 allosteric regulators might be sufficient to mimic IL10's anti-  
205 inflammatory action *in vivo*, we examined whether ZPR-MN100 could reduce inflammation in the IL10  
206 knock-out mouse model of colitis ([Keubler et al., 2015](#)). IL10 knock-out mice develop colitis when  
207 colonized with normal gut flora because IL10 is needed to temper the host immune response to intestinal  
208 commensal bacteria ([Keubler et al., 2015](#), [Kuhn et al., 1993](#)). We initiated colitis in IL10<sup>-/-</sup> mice by  
209 inoculating them with the freshly isolated colon contents of normal, specific pathogen free mice and  
210 allowed inflammation to develop for 6 weeks ([Sydora et al., 2003](#)). Mice were then treated for 3 weeks  
211 with vehicle, 2 mg/kg ZPR-MN100, or 0.4 mg/kg dexamethasone (anti-inflammatory steroidal drug used

212 as positive control) prior to colon tissue collection for analyses. Hematoxylin and eosin stained sections  
213 were prepared from the proximal, mid and distal colons of mice, as well as from mice not inoculated with  
214 flora (no colitis group) (**Figure 8A**). Two investigators blinded to the treatment groups scored the sections  
215 based on submucosal edema, immune cell infiltration, presence of goblet cells and epithelial integrity  
216 (**Figure 8B**). In the three groups where colitis was induced, the dexamethasone and ZPR-MN100 groups  
217 had significantly lower pathology scores than the vehicle group (**Figure 8B**). RNA was prepared from the  
218 colons of all four groups for analysis of IL17 and CCL2 expression, inflammatory mediators elevated in  
219 colitis (Lee et al., 2007). As shown in **Figure 8C**, both ZPR-MN100 and dexamethasone treatment  
220 significantly reduced the levels of IL17 and CCL2 mRNA. These data indicate that ZPR-MN100 treatment  
221 can reduce inflammation in colitis resulting from the loss of IL10.

222

## 223 DISCUSSION

224 IL6 and IL10 have opposing pro- and anti-inflammatory actions respectively on macrophages (Garbers et  
225 al., 2015, Yasukawa et al., 2003) but both cytokines stimulate tyrosine phosphorylation of STAT3 Y705 in  
226 cells. We found that IL10 but not IL6 induced association of STAT3 with SHIP1, and suggest this difference  
227 may contribute to why STAT3 can mediate pro- and anti-inflammatory responses downstream of both  
228 cytokines. Perhaps IL10-induced SHIP1/STAT3 signaling support anti-inflammatory responses while IL6-  
229 induced STAT3/STAT3 dimers support pro-inflammatory responses. Yasukawa *et al's* study of SOCS3  
230 knockout cells suggested that the duration of STAT3 activation in macrophage cells can underlie the  
231 opposite biological effects of IL10 and IL6 (Yasukawa et al., 2003). Our data are compatible with theirs  
232 since STAT3 activation can also be prolonged by its association with SHIP1.

233 Our SHIP1 pulldown studies used an N-terminal His<sub>6</sub>-tagged SHIP1 construct transduced into a SHIP<sup>-/-</sup> cell  
234 line. We were unable to co-precipitate SHIP1 and STAT3 with any other SHIP1 antibody (which are all  
235 directed to other regions of SHIP1). This suggests the N-terminus of SHIP1 is accessible in the SHIP1/STAT3  
236 complex. Caveats of using cell lines transduced with His<sub>6</sub>-tagged SHIP1 include possible expression of  
237 SHIP1 to higher levels than seen in wild-type cells. However, as shown in **Figure S3**, the level of His<sub>6</sub>-  
238 tagged SHIP1 is similar to that of SHIP1 in SHIP<sup>+/+</sup> cells. Another caveat is that associations seen in an *in*  
239 *vitro* pull-down experiment might not occur in intact cells. However, we were able to use FRET to show  
240 that Clover tagged SHIP1 and mRuby2 tagged STAT3 associate in cells in response to IL10 or ZPR-151  
241 (**Figure 2C**). Future studies involve generation of antibodies to the N-terminus of SHIP1 in order to study  
242 endogenous SHIP1. We are interested in how IL10R signaling leads to SHIP1 working with STAT3 while IL6  
243 receptor does not. We will also study whether a SHIP1/STAT3 complex induces expression of anti-  
244 inflammatory genes, or the presence of SHIP1 in the nucleus interferes with expression of IL6-induced,  
245 STAT3-regulated genes.

246 We previously showed that small molecule SHIP1 agonists have anti-inflammatory actions *in vitro*  
247 (Meimetis et al., 2012, Ong et al., 2007) and ascribed these actions to the stimulation of SHIP1's  
248 phosphatase to dephosphorylate the PI3K product PIP<sub>3</sub> into PI(3,4)P<sub>2</sub> (Fernandes et al., 2013, Huber et al.,  
249 1999, Krystal, 2000, Pauls and Marshall, 2017). However, our current data demonstrate a SHIP1 protein  
250 with non-detectable phosphatase activity is sufficient to mediate the anti-inflammatory effect of IL10, so  
251 the adaptor function of SHIP1 can by itself support IL10 action. Our SAXS analyses suggest that the binding  
252 of SHIP1 agonists to SHIP1 causes a conformational change in SHIP1. This conformational change may  
253 allow SHIP1 to interact with STAT3 and the complex of SHIP1/STAT3 to translocate to the nucleus. We

254 have solved the structure of the minimal domain (PAC1/2) of SHIP1 required to mediate the allosteric  
255 action of SHIP1 agonists, and identified a drug binding pocket through molecular docking analysis.  
256 Mutation of a residue predicted to be involved in binding to ZPR-151 abolished ZPR-151 binding and the  
257 ability of SHIP1 to mediate IL10 inhibition of TNF $\alpha$  expression in macrophages.

258 We found that SHIP1 Y190 contributes to the ability of SHIP1 to associate with STAT3. The Y190F mutant's  
259 ability to interact with STAT3 was reduced 2-fold as compared to wild-type SHIP1 (**Figure 3B**). However,  
260 SHIP1 Y190F is completely impaired in its ability to support IL10 inhibition of TNF $\alpha$  (**Figure 3A**). One  
261 interpretation is the partial SHIP1/STAT3 complex inhibition is physiologically significant because  
262 inhibition of TNF $\alpha$  is completely abolished. Alternatively, the SHIP1/STAT3 complex formation is only one  
263 function of the Y190. Remarkably, the SHIP1 agonist ZPR-151 could by itself induce formation of a  
264 SHIP1/STAT3 complex. The addition of ZPR-151 to perimacs could also induce translocation of SHIP1 and  
265 STAT3 to the nucleus. Together these data suggest that the action of SHIP1 agonists includes both their  
266 ability to stimulate SHIP1 phosphatase activity and to induce the association of SHIP1 with STAT3.

267 Treatment of macrophages with ZPR-151/ZPR-MN100 was sufficient to elicit the anti-inflammatory effects  
268 similar to that of IL10 *in vitro* in this and our previous studies ([Chan et al., 2012](#), [Cheung et al., 2013](#), [Ong  
269 et al., 2007](#)). We thus tested ZPR-MN100 in a mouse model of colitis since the beneficial anti-  
270 inflammatory action of IL10 in colitis is through IL10 action on macrophages ([Friedrich et al., 2019](#), [Ouyang  
271 and O'Garra, 2019](#), [Shouval et al., 2014b](#), [Zigmond et al., 2014](#)). We found that ZPR-MN100 was as  
272 effective as dexamethasone in reducing histological and molecular markers of colon inflammation.  
273 Medzhitov's group recently reported IL10 stimulation of mitophagy and inactivation of the inflammasome  
274 as part of its protective effect in colitis, and that this involved STAT3-dependent upregulation of the DDIT4  
275 protein ([Ip et al., 2017](#)). We confirmed IL10 upregulation of DDIT4 in macrophages requires both STAT3  
276 and SHIP1; furthermore, ZPR-151 was by itself able to induce DDIT4 expression (manuscript in  
277 preparation).

278  
279 A small molecule SHIP1 allosteric regulator (AQX-1125/Rosiptor) ([Stenton et al., 2013a](#), [Stenton et al.,  
280 2013b](#)) developed independently of the authors of this manuscript was recently tested in clinical trials for  
281 relief of urinary bladder pain experienced by interstitial cystitis (IC) patients ([Nickel et al., 2016](#)). IC  
282 reportedly was chosen for the disease indication because: AQX-1125/Rosiptor accumulates in the urinary  
283 bladder ([Stenton et al., 2013b](#)), two papers implicated PI3K-dependent inflammation in IC ([Liang et al.,  
284 2016](#), [Qiao et al., 2014](#)), and preliminary phase 2 trials seemed promising ([Nickel et al., 2016](#)). However,

285 the phase 3 trial failed to show efficacy for AQX-1125/Rosiptor (Nickel et al., 2019). There are many  
286 reasons for small molecule drugs to fail during the drug development process. However, we note that  
287 neither IL10 nor SHIP1 has been implicated in the physiology/pathophysiology of IC (Nickel et al., 2019).  
288 Furthermore, we found that AQX-1125/Rosiptor has very weak binding to SHIP1, consistent with Stenton's  
289 *et al* finding that AQX-1125 has very weak SHIP1 phosphatase activating ability (Stenton et al., 2013b).

290

291 We suggest that disease indications for which small molecule SHIP1 allosteric regulators are developed  
292 should be ones in which IL10 ) (Friedrich et al., 2019, Ouyang and O'Garra, 2019, Ouyang et al., 2011) (or  
293 other physiological regulators of SHIP1) (Hibbs et al., 2018, Chan et al., 2012, Cheung et al., 2013,  
294 Dobranowski and Sly, 2018, Pauls and Marshall, 2017) has been shown to play a beneficial role. These  
295 small molecules should also have similar binding properties to SHIP1 as its natural ligand PI(3,4)P<sub>2</sub>. By  
296 these criteria, small molecule SHIP1 agonists such as those of the Pelorol family should be explored for  
297 the treatment of human inflammatory bowel disease.

298

299

300

301 **ACKNOWLEDGEMENTS**

302 We gratefully acknowledge Dr. Laura Sly for her critical review of the manuscript, and Dr. Nada Lallous for  
303 her advice for the BLI studies. Funding sources include: Canadian Institutes for Health Research (CIHR)  
304 (MOP-84539 to ALM), the Canadian Cancer Society Research Institute (Canadian Cancer Society grant #  
305 017289 to ZPR), and an NSERC Discovery grant to SAM. STC and AML held CIHR Doctoral Research and  
306 Michael Smith Foundation for Health Research (MSFHR) awards. We thank the support staff at the  
307 Advanced Photon Source (Chicago) GM/CA-CAT beamline 23-ID-D, the Stanford Synchrotron Radiation  
308 Lightsource (Menlo Park, USA), and at the Canadian Light Source (Saskatoon, SK, Canada), which is  
309 supported by the Natural Sciences and Engineering Research Council of Canada, the National Research  
310 Council Canada, the Canadian Institutes of Health Research (CIHR), the Province of Saskatchewan,  
311 Western Economic Diversification Canada, and the University of Saskatchewan.

312

313 **AUTHOR CONTRIBUTIONS**

314 Contribution: TCC, STC, JSJY, and ALM designed and performed research, analyzed data and wrote the  
315 manuscript. SS, AS, DS, SAM and KJ performed experiment(s) and analyzed data. BRG collected and  
316 analyzed crystallographic data. GK, CJO, JP, ZPR, SAM and FVP provided reagents and assisted with  
317 manuscript preparation.

318 Conflict of interest disclosure: ALM, RA, CO, and GK were scientific founders of Aquinox Pharmaceuticals  
319 but have not been associated with, or receive compensation from the company since 2010.

320

321

322

323

324

325

326



327

## 328 CONTACT FOR REAGENT AND RESOURCE SHARING

329 Further information and requests for resources and reagents should be directed to and will be fulfilled by  
330 the Lead Contact, Alice Mui ([alice.mui@ubc.ca](mailto:alice.mui@ubc.ca)).

## 331 EXPERIMENTAL MODEL AND SUBJECT DETAILS

332 **Mouse colonies.** BALB/c mice wild type ( $^{+/+}$ ) or SHIP1 knockout ( $^{-/-}$ ) mice were provided by Dr. Gerald  
333 Krystal (BC Cancer Research Centre, Vancouver, BC). The generation of STAT3 $^{-/-}$  mice started with crossing  
334 C57BL/6 STAT3 flox/flox mice (Dr. Shizuo Akira, Hyogo College of Medicine, Nishinomiya, Japan) with  
335 C57BL/6 LysMcre mice (Jackson Laboratory). Their offspring were then crossed with homozygous STAT3  
336 flox/flox mice to produce to generate both STAT3 flox/flox /LysMCre $^{+/-}$  mice (referred to be STAT3 $^{-/-}$  mice)  
337 and STAT3 flox/flox mice (STAT3 $^{+/+}$  mice) in the same litters. All mice were maintained in accordance with  
338 the ethic protocols approved by the University of British Columbia Animal Care Committee.

339 **Constructs.** The mammalian (lentiviral) expression plasmids of SHIP1 in FUGWBW were generated using  
340 Gateway LR reactions from pENTR1A (Invitrogen, Burlington, ON) constructs. A pENTR1A-His<sub>6</sub>-SHIP1 WT  
341 (SHIP1 Uniprot ID Q9ES52) plasmid was used as the template for standard primer based, site-directed  
342 mutagenesis to generate the K681A, Y190F, Y799F, Y659F and Y657F mutants. The phosphatase disrupted  
343 SHIP1 construct (P671A, D675A, and R676G in the phosphatase domain) was kindly provided by Dr. KS  
344 Ravichandran (University of Virginia). The constructs were confirmed by DNA sequencing. Subsequently,  
345 a Gateway LR reaction was performed between pENTR1A construct and FUGWBW (FUGW in which the  
346 green fluorescent protein was replaced by the Gateway cassette, and a blasticidin S resistance gene  
347 expression cassette was inserted downstream of the Gateway cassette (Peacock et al., 2009). Success of  
348 the LR reaction was confirmed by restriction enzyme digest. For Clover/mRuby2 based FRET experiments  
349 (Lam et al., 2012), pENTR1A Clover-SHIP1 was constructed by inserting a Clover fragment from pcDNA3  
350 Clover (Addgene) to the N-terminal of SHIP1 in pENTR1A-His<sub>6</sub>-SHIP1 WT, replacing the His<sub>6</sub>.pENTR1A  
351 STAT3-mRuby2 was constructed by cloning murine STAT3 (Uniprot ID P42227) into pENTR1A followed by  
352 insertion of a mRuby2 fragment from pcDNA3 mRuby2 (Addgene) to the N-terminus of STAT3. Constructs  
353 were confirmed by sequencing and transferred to FUGWBW as above.

354

355 Bacteria expression vectors to produce recombinant proteins for crystallography and biolayer  
356 interferometry were generated by ligase-independent cloning (LIC) methodology in the LIC-HMT vector  
357 (Van Petegem et al., 2004). This plasmid contains an N-terminal tag composed of His<sub>6</sub> and maltose binding  
358 protein (MBP), followed by a TEV protease cleavage site (abbreviated as the HMT-tag). The PCR product  
359 was purified and treated with T4 DNA polymerase (LIC-quality) (Novagen, Madison, WI) in the presence  
360 of dCTP only. The LIC-HMT vector was digested with *SspI* and the linearized plasmid was treated with T4  
361 DNA polymerase in the presence of dGTP only. Equal volumes of insert and vector were mixed and  
362 incubated at room temperature for 10 minutes, followed by transformation into chemical competent *E.*  
363 *coli DH5α* cells using the standard heat shock protocol, and selection on kanamycin-containing LB agar  
364 plates. To generate different PAC2 mutants, standard site-directed mutagenesis was employed. Identities  
365 of all plasmids were confirmed by DNA sequencing.

366  
367 **Cell lines.** J16 and J17 cell lines derived from SHIP1<sup>+/+</sup> and <sup>-/-</sup> BMDM respectively were previously described  
368 (Ming-Lum et al., 2012) and cultured in Mac media (IMDM supplemented with 10% (v/v) FCS, 10  $\mu$ M  $\beta$ -  
369 mercaptoethanol, 150  $\mu$ M monothioglycolate and 1 mM L-glutamine). J17 cells expressing wild type and  
370 mutant His<sub>6</sub>-SHIP1, Clover-SHIP1 or mRuby2-STAT3 constructs were generated by lentivirus mediated  
371 gene transfer as described (Cheung et al., 2013). Transduced cells were selected with 5  $\mu$ g/ml blasticidin.  
372 Clover-SHIP1 and mRuby2-STAT3 cells were further subjected to fluorescent activated cell sorting to select  
373 the brightest cells on a FACS Aria II cytometer.

374  
375 **Isolation of mouse peritoneal macrophages.** Primary peritoneal macrophages (perimacs) were isolated  
376 from mice by peritoneal lavage with 3 ml of sterile Phosphate Buffered Saline (PBS) (Thermo Fisher  
377 Scientific, Nepean, ON). Perimacs were collected and transferred to Mac media.

378  
379 **Production of bone marrow-derived macrophages.** Bone marrow-derived macrophages (BMDMs) were  
380 generated by first collecting femurs and tibiae from mice, and then flushing out the bone marrow through  
381 a 26-G needle. Extracted cells were plated, in Mac media supplemented with 5 ng/ml each of CSF-1 and  
382 GM-CSF (Stem Cell Technologies, Vancouver, BC), on a 10-cm tissue culture plate for 2 hours at 37°C. Non-  
383 adherent cells were collected and replated at  $9 \times 10^6$  cells per 10-cm tissue culture plate. Cells were then  
384 cultured in the presence of CSF-1 and GM-CSF. Differentiated BMDMs were used after 7 to 8 days. All  
385 cells were maintained in a 37°C, 5% CO<sub>2</sub>, 95% humidity incubator.

## 386 387 **METHOD DETAILS**

388  
389 **Continuous Flow Cultures.** The continuous flow apparatus facilitates constant stimulation and removal of  
390 cell supernatants to determine kinetic profiles of cytokine production over time. BMDMs were seeded at  
391  $3 \times 10^5$  cells per well in a 24-well tissue culture plate that had been coated with poly-L-lysine (Thermo Fisher  
392 Scientific, Nepean, ON) and rinsed with PBS. After overnight incubation, culture media was removed and  
393 Leibovitz's L-15 (L-15) media (Invitrogen, Burlington, ON) supplemented with 3% FCS, 10  $\mu$ M  $\beta$ -  
394 mercaptoethanol and 150  $\mu$ M monothioglycolate was added. Cells were allowed to equilibrate in L-15  
395 media for 1 hour before being placed in the continuous flow apparatus. Stimulation solution was made in  
396 the same media equilibrated at 37°C, and was passed through a modified inlet fitted to the well by a  
397 syringe pump (New Era Syringe Pumps Inc., Farmingdale, NY). A flow rate of 150  $\mu$ l per minute was used.  
398 At the same time, cell supernatants were removed from the well at the same flow rate, and fractions were  
399 collected at 5-minute intervals over the course of 3 hours. These fractions were analyzed for secreted  
400 TNF $\alpha$  levels by ELISA.

401  
402 **Real-time quantitative PCR.** . Total RNA was extracted using Trizol reagent (Invitrogen, Burlington, ON)  
403 according to manufacturer's instructions. About 2-5  $\mu$ g of RNA were treated with DNaseI (Roche  
404 Diagnostics, Laval, QC) according to the product manual. For mRNA expression analysis, 120 ng of RNA  
405 were used in the Transcriptor First Strand cDNA synthesis kit (Roche Diagnostics, Laval, QC), and 0.1  $\mu$ l to  
406 0.2  $\mu$ l of cDNA generated were analyzed by SYBR Green-based real time PCR (real time-PCR) (Roche  
407 Diagnostics, Laval, QC) using 300 nM of gene-specific primers . Expression levels of mRNA were measured

408 with the StepOne Plus RT-PCR system (Applied Biosystems, Burlington, ON), and the comparative Ct  
409 method was used to quantify mRNA levels using GAPDH as the normalization control.

410  
411 **Measurement of TNF $\alpha$  production.** Cells were seeded at  $50 \times 10^4$  cells per well in a 96-well tissue culture  
412 plate and allowed to adhere overnight. Media was changed the next day 1 hour prior to stimulation. Cells  
413 were stimulated with 1 or 10 ng/ml LPS +/- various concentrations of IL10 for 1 hour. Supernatant was  
414 collected and secreted TNF $\alpha$  protein levels were measured using a BD OptEIA Mouse TNF $\alpha$  Enzyme-Linked  
415 Immunosorbent Assay (ELISA) kit (BD Biosciences, Mississauga, ON). Triplicates wells were used for each  
416 stimulation condition. IC50 values were calculated from three independent experiments and differences  
417 in IL10 IC50 values from cells expressing SHIP1 mutants vs SHIP1 WT protein were analyzed by one-way  
418 ANOVA.

419  
420 **In vitro phosphatase assay.** The phosphatase assay was performed in 96-well microtiter plates with 10  
421 ng of enzyme/well in a total volume of 25  $\mu$ L in 20 mM Tris-HCl, pH 7.4, 150 mM NaCl, 0.05% Tween-20,  
422 10 mM MgCl<sub>2</sub> as described (Ong et al., 2007). Enzyme was incubated with or ZPR-MN100 (dissolved in  
423 ethanol) for 10 minutes at 23°C, before the addition of 50  $\mu$ M of inositol-1,3,4,5-tetrakisphosphate (IP<sub>4</sub>)  
424 (Echelon Bioscience Inc., Salt Lake City, Utah). The reaction was allowed to proceed for 10 minutes at  
425 37°C and the amount of inorganic phosphate released was assessed by the addition of Malachite Green  
426 reagent and absorbance measurement at 650 nm. For enzyme kinetic determination, different  
427 concentrations of IP<sub>4</sub> (0 – 300  $\mu$ M) were used and the reactions were stopped at different time points.  
428 Initial velocities were calculated, and K<sub>cat</sub> and K<sub>M</sub> were determined using GraphPad 6 software.

429  
430 **In vitro pull down assay.** J17 His<sub>6</sub>-SHIP1 and Y190F cells were seeded at  $2 \times 10^6$  cells per well in a 6-well  
431 plate. After overnight incubation, fresh cell media was added for 30 minutes before stimulation with 100  
432 ng/ml IL10, IL6 or 20  $\mu$ M ZPR-151 for 5 minutes. Cells were lysed with Protein Solubilization Buffer (PSB,  
433 50 mM Hepes, pH 7.5, 100 nM NaF, 10 mM Na Pyrophosphate, 2 mM NaVO<sub>4</sub>, 2 mM Na Molybdate, 2 mM  
434 EDTA) containing 1% octylglucoside, 0.01 M imidazole, and protease inhibitor cocktail (Roche Diagnostics,  
435 Laval, QC) for 30 minutes at 4°C and centrifuged at 10000 rpm for 15 minutes. EDTA resistant Ni beads  
436 (Roche Diagnostics, Laval, QC) were added to supernatants and the mixture incubated at 4°C for 1 hour  
437 before spinning down and washing of beads three times with 0.1% octylglucoside wash buffer in PSB.  
438 Bead samples and starting material cell lysates were separated on a 7.5 % SDS-PAGE gel.

439  
440 **Immunoblotting.** Protein lysates were separated on SDS-PAGE gels and transferred onto polyvinylidene  
441 fluoride (PVDF) membrane (Millipore, Etobicoke, ON). Membranes were blocked and probed, where  
442 appropriate, with the following primary antibodies overnight: SHIP1 (P1C1) (Santa Cruz Biotechnology),  
443 pSHIP1 (Y190) (Kinexus), STAT3 (9D8) (ThermoFisher Scientific), pSTAT3 (Y705) (Thermo Fisher Scientific),  
444 STAT1 (BD Transduction Laboratories), pSTAT1 (Y701) (Upstate Biotechnology), GAPDH and actin (Sigma-  
445 Aldrich). Membranes were developed with either Alexa Fluor® 660 anti-mouse IgG or Alexa Fluor® 680  
446 anti-rabbit IgG antibodies (Thermo Fisher Scientific) and imaged using a LI-COR Odyssey Imager.

447  
448 **Acceptor Photobleaching FRET analysis.** J17 SHIP1<sup>-/-</sup> cells expressing Clover-SHIP1 and/or mRuby2-STAT3  
449 were seeded at  $50 \times 10^4$  cells per well in 8-well Ibidi  $\mu$ -Slides (Ibidi GmbH, Martinsried, Germany). After

450 overnight incubation, cells were serum-starved with Mac media containing 1% serum for 3 hours before  
451 media replacement with Leibovitz's (L-15) media (Invitrogen, Burlington, ON) supplemented with 1%  
452 serum, 10  $\mu$ M  $\beta$ -mercaptoethanol, 150  $\mu$ M monothiolglycolate and 1 mM L-glutamine for confocal  
453 microscopy imaging. Cells were imaged on a Leica SP8X on DMi8 confocal microscope system with a  
454 63X/1.3 Gly HC PL APO CS2 objective using a white light laser line with 488 nm for donor excitement and  
455 555 nm for acceptor excitement. Photobleaching FRET analysis was performed by measuring Clover-SHIP1  
456 donor fluorescence intensity before and after bleaching the acceptor, mRuby2-STAT3, within a field of  
457 cells 'region of interest' (ROI), at 100% laser intensity for 60 frames. Acceptor photobleaching was  
458 performed first in resting cells then at 1 minute following 'mock' stimulation with L-15 media, or L-15  
459 media containing 100 ng/ml IL10, IL6 or 20  $\mu$ M ZPR-151. Donor and acceptor fluorescence intensity of  
460 individual cells within the bleached ROI was quantified before and after bleaching. Percentage FRET  
461 efficiency was calculated as %FRETeff =  $100 \times (D_{\text{post}} - D_{\text{pre}}) / D_{\text{post}}$  where  $D_{\text{pre}}$  and  $D_{\text{post}}$  represent Clover-SHIP1  
462 donor fluorescence intensity before and after bleaching, respectively.

463  
464 **Immunofluorescence.** Perimacs were seeded at  $3 \times 10^5$  cells per well in 18-well Ibidi  $\mu$ -Slides (Ibidi GmbH,  
465 Martinsried, Germany) and allowed to adhere for 3 hours before washing with PBS to remove non-  
466 adherent cells. CD8+ T cells were seeded at  $2 \times 10^6$  cells in 12-well tissue culture plates. Cells were  
467 stimulated with either 100 ng/ml IL10 or 20  $\mu$ M ZPR-151 for 2 or 20 minutes followed by 3 x PBS washes  
468 and fixing of cells in 4% paraformaldehyde for 15 minutes at room temperature. Cells were incubated with  
469 anti-mouse CD16/CD32 Fc Block (BD Pharmingen) for 1 hour followed by an overnight incubation at 4°C  
470 with either anti-SHIP1 antibody (P1C1) (Santa Cruz Biotechnology) or anti-STAT3 antibody (9D8)  
471 (ThermoFisher Scientific). Cells were then incubated with anti-mouse IgG (H+L)-Alexa Fluor 660 secondary  
472 antibody (ThermoFisher Scientific) for 1 hour, followed by, for perimacs, anti-CD11b-FITC antibody (BD  
473 Pharmingen) for 30 minutes. CD8+ T cells were mounted onto 18-well Ibidi  $\mu$ -Slides prior to confocal  
474 microscopy and cells were stored in Ibidi Mounting Media supplemented with ProLong Gold antifade  
475 reagent with DAPI (Molecular Probes, Life Technologies). Cells were imaged on a Leica SP5II on DM6000  
476 confocal microscope with a 63x/1.4-0.6 Oil PL APO objective using 405, 488 and 633 nm laser lines for  
477 excitation. Final images were scanned sequentially acquiring eight Z-stacks with a frame-average of four.  
478 Co-localization analysis was performed using ImageJ software by first combining individual z-stack  
479 confocal images then performing deconvolution and co-localization using CUDA deconvolution and JACoP  
480 plugins respectively. Pearson's coefficient values were produced as a measurement of the degree of  
481 overlap between SHIP1 or STAT3 with CD11b (for Perimacs) or DAPI.

482  
483 **Mouse Endotoxemia Model.** Groups of 6-8 week old BALB/c SHIP1<sup>+/+</sup> and SHIP1<sup>-/-</sup> mice were  
484 intraperitoneally injected with either 1 or 5 mg/kg of LPS with or without co-administration of 1 mg/kg of  
485 IL10 or 5 mg/kg ZPR-MN100. Blood was drawn 1 hour later by cardiac puncture for determination of  
486 plasma cytokine levels by ELISA.

487  
488 **Mouse Colitis Model.** Colitis was induced in 6-8 week old BALB/c IL10<sup>-/-</sup> mice by administering the colonic  
489 contents of conventional C57BL/6 mice diluted 1:10 in PBS by oral gavage. Mouse weights and fecal  
490 consistencies were monitored and colitis allowed to develop for 6 weeks. Ethanol (Vehicle) and ZPR-

491 MN100 (3 mg/kg) was diluted in cage drinking water and dexamethasone (0.4 mg/kg) was administered  
492 every 2 days by oral gavage for 3 weeks. At the end of the dosing period, proximal, medial and distal colon  
493 sections were collected for paraffin embedding or stored in RNALater (Invitrogen, Mississauga, ON) for  
494 RNA extraction. Slides were prepared, stained with hematoxylin and eosin, and mounted by the UBC  
495 Department of Pathology and Laboratory Medicine Histochemistry Facility. Specimens were assigned  
496 pathological scores by two, independent, blinded investigators according to a method described by  
497 Madsen *et al* (Madsen *et al.*, 2001). In brief, colonic inflammation was graded using a 4-point scale,  
498 scoring 0-3 for each of submucosal edema, immune cell infiltration, goblet cell ablation, and integrity of  
499 the epithelial layer. For analysis of mRNA expression, colon sections were homogenized and total RNA  
500 extracted as described above and analyzed by real time PCR using gene specific primers for IL17, CCL2,  
501 and GAPDH (normalization control).

502  
503 **Expression of PAC2 for crystallography.** LIC-HMT-PAC2 expression vector was transformed into *E. coli*  
504 *Rosetta(DE3) pLacI* cells. Overnight culture was inoculated with a 250-fold dilution to start the actual  
505 culture. The cells were grown at 37°C in LB medium (supplemented with 50 µg/ml of kanamycin and 34  
506 µg/ml of chloramphenicol) with shaking at 225 rpm. When OD<sub>600</sub> reached about 0.6, the culture was  
507 cooled down to room temperature before the addition of 0.4 mM isopropyl β-D-1-thiogalactopyranoside  
508 (IPTG) to induce the expression of recombinant protein. Cultures were left in the shaker overnight (usually  
509 16-18 hours) at 22°C, and then collected by centrifugation (5000 g for 10 minutes at 4°C). The cell pellet  
510 was subsequently resuspended in lysis buffer (20 mM Tris-HCl pH 7.4, 350 mM NaCl, 10 mM TCEP, 5 mM  
511 imidazole, supplemented with 1X EDTA-free Protease Inhibitor Cocktail (PIC) (Roche Diagnostics, Laval,  
512 QC) and 25 µg/ml lysozyme), and lysed via sonication (2 cycles of 2 minutes pulse) on ice. Cell debris was  
513 removed by two rounds of centrifugation, first at 5000 g for 15 minutes at 4°C followed by 18000 rpm for  
514 30 minutes at 4°C. Supernatant was filtered with a 0.45 µm filter and loaded onto a Talon Co<sup>2+</sup>-affinity  
515 column, previously equilibrated with Buffer A (20 mM Tris-HCl pH 7.4, 250 mM NaCl, 1 mM TCEP), and  
516 washed with 10 column volume (CV) of Buffer B (Buffer A + 5 mM imidazole). Bound proteins were eluted  
517 with 6 CV of Buffer C (Buffer A + 50 mM imidazole).

518  
519 To remove the HMT tag, TEV protease (purified in house as a His<sub>6</sub>-tagged protein) was added to the eluted  
520 protein, which was then dialyzed against Buffer D (20 mM Tris-HCl pH 7.4, 250 mM NaCl, 1 mM TCEP)  
521 overnight at 4°C with gentle stirring. The dialyzed sample was loaded onto the Amylose column (New  
522 England Biolabs, Whitby, ON), and the flow through, which contained the untagged protein, was loaded  
523 onto the Talon column to remove the His<sub>6</sub>-TEV protease. The flow through from the Talon column was  
524 dialyzed against Buffer E (20 mM Tris-HCl pH 7.4, 25 mM NaCl, 1 mM TCEP) overnight at 4°C with gentle  
525 stirring, and then loaded onto the ResourceQ column (6 ml column volume) (GE Healthcare, Mississauga,  
526 ON), followed by washes with 3 CV of Buffer E. To elute the protein, Buffer F (20 mM Tris-HCl pH 7.4,  
527 1000 mM NaCl, 1 mM TCEP) was used. A gradient from 25 mM NaCl (0% buffer G) to 200 mM NaCl (20%  
528 Buffer G) was used across 20 CV to separate the components in the protein sample. The fractions were  
529 analyzed by SDS-PAGE. PAC2 usually eluted from the ResourceQ column at ~130 mM NaCl. The purified  
530 protein was concentrated to about 5-10 mg/ml using Amicon concentrators with 30K MWCO (Millipore,  
531 Etobicoke, ON), and exchanged into the desired buffer. For protein crystallization, the desired buffer



532 contained 50 mM Tris-HCl pH7.4, 25 mM NaCl and 0.5 mM TCEP. For Biolayer Interferometry, HMT-PAC2  
533 proteins eluted from the first Talon column were directly purified on the ResourceQ column without  
534 cleavage of the HMT tag.

535

536 **Expression of PAC2-Avi tag for Biolayer interferometry.** A sequence corresponding to Avi-tag  
537 (GLNDIFEAQKIEWHE) was added to the c-terminal end of the PAC2 in LIC-HMT-PAC2 expressing vector via  
538 standard restriction digestion and ligation. The LIC-HMT-PAC2-Avi expressing vector was then co-  
539 transformed into *E.coli BL21* cells with pBirAcm expression vector in 1:1 molar ratio. Overnight culture  
540 was inoculated with a 250-fold dilution to start the actual culture. The cells were grown at 37°C in LB  
541 medium (supplemented with 50 µg/mL of kanamycin and 10 µg/mL of chloramphenicol) with shaking  
542 speed of 225 rpm. When OD<sub>600</sub> reached about 0.6, 5 mM of biotin in bicine buffer pH 8.3 was added to  
543 the culture to have final concentration of 125 µM of biotin. The culture was then cooled down to room  
544 temperature before the addition of 0.4 mM isopropyl-B-D-1-thiogalactopyranoside (IPTG) to induce the  
545 expression of the recombinant protein with Avi-tag. The rest of the method is identical as written in  
546 “Expression of PAC2 for crystallography”.

547

548 **Protein crystallization, data collection, phasing and refinement.** Initial crystallization hits were obtained  
549 via sparse matrix screening in 96-well plates using commercially available crystallographic solutions  
550 (Qiagen, Toronto, ON). Optimization of crystallization conditions was performed in 24-well plate format  
551 using the hanging drop vapor diffusion method. Diffraction-quality protein crystals were obtained at 4-7  
552 mg/ml protein at room temperature with 0.1 M HEPES-NaOH pH 6.7, 20% PEG1500 and 5 mM MgCl<sub>2</sub>. The  
553 PAC2-cc protein contained surface entropy reduction mutations (E770A, E772A, E773A) and aided in  
554 improving crystal quality. Unique fragments of crystal clusters of protein were soaked for 5 to 10 seconds  
555 in the crystallization solution containing 25% isopropanol, and flash-frozen in liquid nitrogen.

556

557 Diffraction data set were collected at the Advance Proton Source (APS) beamline 23-ID-D-GM/CA and  
558 processed with XDS through XDSGUI<sup>45</sup>. The phase problem was solved with an unpublished structure as  
559 search model in Phaser MR<sup>47</sup>. The initial model was refined with COOT<sup>48</sup> and Refmac5<sup>49</sup>. Towards the  
560 final model occupancy refinement of sidechains was used in Phenix(Adams et al., 2010) and three TLS  
561 groups were defined. Data collection and refinement statistics are shown in **Table S1**. The model and data  
562 were deposited under protein database ID 6DLG.

563

564 **Small angle X-ray scattering.** PAC1 samples in 190 µM in 50 mM TrisHCl (pH7.4) 150 mM NaCl, 1 mM TCEP  
565 and 2% EtOH with and without 570 µM ZPR-MN100 (6 fold molar excess). Dynamic Light Scattering (DLS)  
566 data for PAC1 and PAC1-ZPR-MN100 complexes were collected prior to SAXS data collection to confirm  
567 that all the samples are highly pure and suitable for data collection. The data collection was performed  
568 on a 3-pinhole camera (S-MAX3000; Rigaku Americas, The Woodlands, TX) equipped with a Rigaku  
569 MicroMaxp002 microfocus sealed tube (Cu K $\alpha$  radiation at 1.54 Å) and a Confocal Max-Flux (CMF) optics  
570 system operating at 40 W (Rigaku). Scattering data were recorded using a 200 mm multiwire two-  
571 dimensional detector. The data for both samples and buffer were collected for 3 h for each sample within  
572 the range of  $0.008 \leq s \leq 0.26 \text{ \AA}^{-1}$  and processed according to the method previously described, where  $s$

573 =  $4\pi\sin\theta/\lambda$  (Patel et al., 2011, Patel et al., 2010, Patel et al., 2012). The Normalized Spatial Discrepancy  
574 (NSD) of the non-liganded and liganded PAC1 models were 0.6 and 1.0 respectively.

575  
576 **Biolayer interferometry.** The binding affinity between the PAC2 protein and small molecule allosteric  
577 regulators was examined via bio-layer interferometry (BLI) experiments using super-streptavidin (SSA)  
578 biosensor tips and an Octet Red 96 instrument (ForteBio, Fremont, CA). SSA biosensor tips were hydrated  
579 in assay buffer 20 mM Tris-HCl (pH 7.4), 150 mM NaCl, 10 mM MgCl<sub>2</sub>, 0.5 mM TCEP, 0.2% Tween-20 prior  
580 to protein immobilization. 0.5 ug/mL of protein was immobilized to the SSA biosensor overnight at 4°C.  
581 After immobilization of protein to the biosensor, the tips were blocked with 0.1% BSA for 90 minutes  
582 followed by 20 minutes of wash with assay buffer supplemented with 1% EtOH. The kinetic measurement  
583 was done at 30°C with orbital flow of 1,000 RPM. The baseline was achieved with the assay buffer  
584 supplemented with 1% EtOH for 60 s. The association was measured for 600 s at an analyte concentration  
585 of 20 μM followed by dissociation for 300 s in the same buffer as the baseline. The raw data was analyzed  
586 using the Octet Red Data Analysis software (ver. 8.2). The raw data were aligned to the baseline and  
587 subtracted using both single and double reference subtraction.

588

#### 589 **QUANTIFICATION AND STATISTICAL ANALYSIS**

590

591 The band quantification of all immunoblots were performed using LI-COR Odyssey imaging system and  
592 Image Studio™ Lite software (LI-COR Biosciences, Lincoln, NE). GraphPad Prism 6 (GraphPad Software Inc.,  
593 La Jolla, CA) was used to perform all statistical analyses. Statistical details can be found in figure legends.  
594 Values are presented as means ± standard deviations. Unpaired *t* tests were used where appropriate to  
595 generate two-tailed *P* values. One-way or Two-way ANOVA were performed where required with  
596 appropriate multiple comparisons tests. Differences were considered significant when  $p\leq 0.05$ .

597

#### 598 **DATA AND SOFTWARE AVAILABILITY**

599

600 The X-ray crystallography data that supports the findings of this study has been deposited in the  
601 Worldwide Protein Data Bank (wwPDB) under the ID code, PDB ID 6DLG.

602

#### 603 **CONTACT FOR REAGENT AND RESOURCE SHARING**

604 Further information and requests for resources and reagents should be directed to and will be fulfilled by  
605 the Lead Contact, Alice Mui (alice.mui@ubc.ca).

606

607

608

609

610

## 611 REFERENCES

- 612 ADAMS, P. D., AFONINE, P. V., BUNKOCZI, G., CHEN, V. B., DAVIS, I. W., ECHOLS, N., HEADD, J. J., HUNG,  
613 L.-W., KAPRAL, G. J., GROSSE-KUNSTLEVE, R. W., MCCOY, A. J., MORIARTY, N. W., OEFFNER, R.,  
614 READ, R. J., RICHARDSON, D. C., RICHARDSON, J. S., TERWILLIGER, T. C. & ZWART, P. H. 2010.  
615 PHENIX: a comprehensive Python-based system for macromolecular structure solution. *Acta*  
616 *Crystallographica Section D* 66, 213-221.
- 617 AN, H., XU, H., ZHANG, M., ZHOU, J., FENG, T., QIAN, C., QI, R. & CAO, X. 2005. Src homology 2 domain-  
618 containing inositol-5-phosphatase 1 (SHIP1) negatively regulates TLR4-mediated LPS response  
619 primarily through a phosphatase activity- and PI-3K-independent mechanism. *Blood* 105, 4685-  
620 92.
- 621 BAN, F., DALAL, K., LEBLANC, E., MORIN, H., RENNIE, P. S. & CHERKASOV, A. 2018. Cheminformatics Driven  
622 Development of Novel Therapies for Drug Resistant Prostate Cancer. *Molecular Informatics* 37,  
623 1800043.
- 624 BERG, D. J., KUHN, R., RAJEWSKY, K., MULLER, W., MENON, S., DAVIDSON, N., GRUNIG, G. & RENNICK, D.  
625 1995. Interleukin-10 is a central regulator of the response to LPS in murine models of endotoxic  
626 shock and the Shwartzman reaction but not endotoxin tolerance. *J Clin Invest* 96, 2339-47.
- 627 BROWN, J., WANG, H., HAJISHENGALLIS, G. N. & MARTIN, M. 2010. TLR-signaling Networks: An Integration  
628 of Adaptor Molecules, Kinases, and Cross-talk. *Journal of Dental Research* 90, 417-427.
- 629 CHAN, C. S., MING-LUM, A., GOLDS, G. B., LEE, S. J., ANDERSON, R. J. & MUI, A. L. 2012. Interleukin-10  
630 inhibits lipopolysaccharide-induced tumor necrosis factor-alpha translation through a SHIP1-  
631 dependent pathway. *J Biol Chem* 287, 38020-7.
- 632 CHEUNG, S. T., SO, E. Y., CHANG, D., MING-LUM, A. & MUI, A. L. 2013. Interleukin-10 inhibits  
633 lipopolysaccharide induced miR-155 precursor stability and maturation. *PloS one* 8, e71336.
- 634 DEREWENDA, Z. S. 2004. Rational protein crystallization by mutational surface engineering. *Structure* 12,  
635 529-35.
- 636 DOBRANOWSKI, P. & SLY, L. M. 2018. SHIP negatively regulates type II immune responses in mast cells  
637 and macrophages. *J Leukoc Biol*.
- 638 EL KASMI, K. C., HOLST, J., COFFRE, M., MIELKE, L., DE PAUW, A., LHOCINE, N., SMITH, A. M., RUTSCHMAN,  
639 R., KAUSHAL, D., SHEN, Y., SUDA, T., DONNELLY, R. P., MYERS, M. G., JR., ALEXANDER, W., VIGNALI,  
640 D. A., WATOWICH, S. S., ERNST, M., HILTON, D. J. & MURRAY, P. J. 2006. General nature of the  
641 STAT3-activated anti-inflammatory response. *Journal of immunology* 177, 7880-8.
- 642 ENGELHARDT, K. R. & GRIMBACHER, B. 2014. IL-10 in humans: lessons from the gut, IL-10/IL-10 receptor  
643 deficiencies, and IL-10 polymorphisms. *Current topics in microbiology and immunology* 380, 1-18.
- 644 FERNANDES, S., IYER, S. & KERR, W. G. 2013. Role of SHIP1 in cancer and mucosal inflammation. *Annals of*  
645 *the New York Academy of Sciences* 1280, 6-10.
- 646 FRIEDRICH, M., POHIN, M. & POWRIE, F. 2019. Cytokine Networks in the Pathophysiology of Inflammatory  
647 Bowel Disease. *Immunity* 50, 992-1006.
- 648 GARBERS, C., APARICIO-SIEGMUND, S. & ROSE-JOHN, S. 2015. The IL-6/gp130/STAT3 signaling axis: recent  
649 advances towards specific inhibition. *Current Opinion in Immunology* 34, 75-82.
- 650 GLOCKER, E. O., KOTLARZ, D., BOZTUG, K., GERTZ, E. M., SCHAFFER, A. A., NOYAN, F., PERRO, M.,  
651 DIESTELHORST, J., ALLROTH, A., MURUGAN, D., HATSCHER, N., PFEIFER, D., SYKORA, K. W., SAUER,  
652 M., KREIPE, H., LACHER, M., NUSTEDE, R., WOELLNER, C., BAUMANN, U., SALZER, U., KOLETZKO,  
653 S., SHAH, N., SEGAL, A. W., SAUERBREY, A., BUDERUS, S., SNAPPER, S. B., GRIMBACHER, B. & KLEIN,  
654 C. 2009. Inflammatory bowel disease and mutations affecting the interleukin-10 receptor. *N Engl*  
655 *J Med* 361, 2033-45.
- 656 GLOCKER, E. O., KOTLARZ, D., KLEIN, C., SHAH, N. & GRIMBACHER, B. 2011. IL-10 and IL-10 receptor defects  
657 in humans. *Annals of the New York Academy of Sciences* 1246, 102-7.



- 658 GOLDSCHMIDT, L., COOPER, D. R., DEREWENDA, Z. S. & EISENBERG, D. 2007. Toward rational protein  
659 crystallization: A Web server for the design of crystallizable protein variants. *Protein science : a*  
660 *publication of the Protein Society* 16, 1569-76.
- 661 HIBBS, M. L., RAFTERY, A. L. & TSANTIKOS, E. 2018. Regulation of hematopoietic cell signaling by SHIP-1  
662 inositol phosphatase: growth factors and beyond. *Growth factors (Chur, Switzerland)* 36, 213-231.
- 663 HUBER, M., HELGASON, C. D., DAMEN, J. E., SCHEID, M., DURONIO, V., LIU, L., WARE, M. D., HUMPHRIES,  
664 R. K. & KRYSTAL, G. 1999. The role of SHIP in growth factor induced signalling. *Progress in*  
665 *biophysics and molecular biology* 71, 423-34.
- 666 HUTCHINS, A. P., DIEZ, D. & MIRANDA-SAAVEDRA, D. 2013. The IL-10/STAT3-mediated anti-inflammatory  
667 response: recent developments and future challenges. *Briefings in Functional Genomics* 12, 489-  
668 498.
- 669 HUTCHINS, A. P., POULAIN, S. & MIRANDA-SAAVEDRA, D. 2012. Genome-wide analysis of STAT3 binding  
670 in vivo predicts effectors of the anti-inflammatory response in macrophages. *Blood* 119, e110-9.
- 671 IP, W. K. E., HOSHI, N., SHOUVAL, D. S., SNAPPER, S. & MEDZHITOV, R. 2017. Anti-inflammatory effect of  
672 IL-10 mediated by metabolic reprogramming of macrophages. *Science (New York, N.Y)* 356, 513-  
673 519.
- 674 IYER, S. S. & CHENG, G. 2012. Role of Interleukin 10 Transcriptional Regulation in Inflammation and  
675 Autoimmune Disease. *Critical reviews in immunology* 32, 23-63.
- 676 KEUBLER, L. M., BUETTNER, M., HÄGER, C. & BLEICH, A. 2015. A Multihit Model: Colitis Lessons from the  
677 Interleukin-10-deficient Mouse. *Inflammatory Bowel Diseases* 21, 1967-1975.
- 678 KRYSTAL, G. 2000. Lipid phosphatases in the immune system. *Semin Immunol* 12, 397-403.
- 679 KUHN, R., LOHLER, J., RENNICK, D., RAJEWSKY, K. & MULLER, W. 1993. Interleukin-10-deficient mice  
680 develop chronic enterocolitis. *Cell* 75, 263-74.
- 681 KUMAR, S., SHUKLA, R., RANJAN, P. & KUMAR, A. 2017. Interleukin-10: A Compelling Therapeutic Target  
682 in Patients With Irritable Bowel Syndrome. *Clinical Therapeutics* 39, 632-643.
- 683 LAM, A. J., ST-PIERRE, F., GONG, Y., MARSHALL, J. D., CRANFILL, P. J., BAIRD, M. A., MCKEOWN, M. R.,  
684 WIEDENMANN, J., DAVIDSON, M. W., SCHNITZER, M. J., TSIEN, R. Y. & LIN, M. Z. 2012. Improving  
685 FRET dynamic range with bright green and red fluorescent proteins. *Nature methods* 9, 1005-12.
- 686 LEE, J. W., BAJWA, P. J., CARSON, M. J., JESKE, D. R., CONG, Y., ELSON, C. O., LITTLE, C. & STRAUS, D. S. 2007.  
687 Fenofibrate represses interleukin-17 and interferon-gamma expression and improves colitis in  
688 interleukin-10-deficient mice. *Gastroenterology* 133, 108-23.
- 689 LIANG, S., LI, J., GOU, X. & CHEN, D. 2016. Blocking mammalian target of rapamycin alleviates bladder  
690 hyperactivity and pain in rats with cystitis. *Molecular pain* 12.
- 691 LOUIS, E., LIBIOULLE, C., REENAERS, C., BELAICHE, J. & GEORGES, M. 2009. Genetics of ulcerative colitis:  
692 the come-back of interleukin 10. *Gut* 58, 1173-6.
- 693 MADSEN, K., CORNISH, A., SOPER, P., MCKAIGNEY, C., JIJON, H., YACHIMEC, C., DOYLE, J., JEWELL, L. & DE  
694 SIMONE, C. 2001. Probiotic bacteria enhance murine and human intestinal epithelial barrier  
695 function. *Gastroenterology* 121, 580-91.
- 696 MATSUDA, T., MUROMOTO, R., SEKINE, Y., TOGI, S., KITAI, Y., KON, S. & ORITANI, K. 2015. Signal  
697 transducer and activator of transcription 3 regulation by novel binding partners. *World journal of*  
698 *biological chemistry* 6, 324-32.
- 699 MEIMETIS, L. G., NODWELL, M., YANG, L., WANG, X., WU, J., HARWIG, C., STENTON, G. R., MACKENZIE, L.  
700 F., MACRURY, T., PATRICK, B. O., MING-LUM, A., ONG, C. J., KRYSTAL, G., MUI, A. L.-F. & ANDERSEN,  
701 R. J. 2012. Synthesis of SHIP1-Activating Analogs of the Sponge Meroterpenoid Pelorol. *European*  
702 *Journal of Organic Chemistry* 2012, 5195-5207.
- 703 MING-LUM, A., SHOJANIA, S., SO, E., MCCARRELL, E., SHAW, E., VU, D., WANG, I., MCINTOSH, L. P. & MUI,  
704 A. L. 2012. A pleckstrin homology-related domain in SHIP1 mediates membrane localization  
705 during Fcγ receptor-induced phagocytosis. *FASEB J* 26, 3163-77.

- 706 MURRAY, P. J. 2005. The primary mechanism of the IL-10-regulated antiinflammatory response is to  
707 selectively inhibit transcription. *Proc Natl Acad Sci U S A* 102, 8686-91.
- 708 MURRAY, P. J. 2006a. STAT3-mediated anti-inflammatory signalling. *Biochemical Society transactions* 34,  
709 1028-31.
- 710 MURRAY, P. J. 2006b. Understanding and exploiting the endogenous interleukin-10/STAT3-mediated anti-  
711 inflammatory response. *Curr Opin Pharmacol* 6, 379-86.
- 712 NICKEL, J. C., EGERDIE, B., DAVIS, E., EVANS, R., MACKENZIE, L. & SHREWSBURY, S. B. 2016. A Phase II  
713 Study of the Efficacy and Safety of the Novel Oral SHIP1 Activator AQX-1125 in Subjects with  
714 Moderate to Severe Interstitial Cystitis/Bladder Pain Syndrome. *The Journal of urology* 196, 747-  
715 754.
- 716 NICKEL, J. C., MOLDWIN, R., HANNO, P., DMOCHOWSKI, R., PETERS, K. M., PAYNE, C. & WEIN, A. 2019.  
717 Targeting the SHIP1 Pathway Fails to Show Treatment Benefit in Interstitial Cystitis/Bladder Pain  
718 Syndrome: Lessons Learned from Evaluating Potentially Effective Therapies in This Enigmatic  
719 Syndrome. *The Journal of urology* 202, 301-308.
- 720 ONG, C. J., MING-LUM, A., NODWELL, M., GHANIPOUR, A., YANG, L., WILLIAMS, D. E., KIM, J., DEMIRJIAN,  
721 L., QASIMI, P., RUSCHMANN, J., CAO, L.-P., MA, K., CHUNG, S. W., DURONIO, V., ANDERSEN, R. J.,  
722 KRYSTAL, G. & MUI, A. L.-F. 2007. Small-molecule agonists of SHIP1 inhibit the phosphoinositide  
723 3-kinase pathway in hematopoietic cells. *Blood* 110, 1942-1949.
- 724 OUYANG, W. & O'GARRA, A. 2019. IL-10 Family Cytokines IL-10 and IL-22: from Basic Science to Clinical  
725 Translation. *Immunity* 50, 871-891.
- 726 OUYANG, W., RUTZ, S., CRELLIN, N. K., VALDEZ, P. A. & HYMOWITZ, S. G. 2011. Regulation and functions  
727 of the IL-10 family of cytokines in inflammation and disease. *Annual review of immunology* 29,  
728 71-109.
- 729 PATEL, T. R., MEIER, M., LI, J., MORRIS, G., ROWE, A. J. & STETEFELD, J. 2011. T-shaped arrangement of  
730 the recombinant agrin G3-IgG Fc protein. *Protein science : a publication of the Protein Society* 20,  
731 931-40.
- 732 PATEL, T. R., MORRIS, G. A., ZWOLANEK, D., KEENE, D. R., LI, J., HARDING, S. E., KOCH, M. & STETEFELD, J.  
733 2010. Nano-structure of the laminin gamma-1 short arm reveals an extended and curved  
734 multidomain assembly. *Matrix biology : journal of the International Society for Matrix Biology* 29,  
735 565-72.
- 736 PATEL, T. R., REUTEN, R., XIONG, S., MEIER, M., WINZOR, D. J., KOCH, M. & STETEFELD, J. 2012.  
737 Determination of a molecular shape for netrin-4 from hydrodynamic and small angle X-ray  
738 scattering measurements. *Matrix biology : journal of the International Society for Matrix Biology*  
739 31, 135-40.
- 740 PAULS, S. D. & MARSHALL, A. J. 2017. Regulation of immune cell signaling by SHIP1: A phosphatase,  
741 scaffold protein, and potential therapeutic target. *Eur J Immunol* 47, 932-945.
- 742 PEACOCK, J. W., PALMER, J., FINK, D., IP, S., PIETRAS, E. M., MUI, A. L., CHUNG, S. W., GLEAVE, M. E., COX,  
743 M. E., PARSONS, R., PETER, M. E. & ONG, C. J. 2009. PTEN loss promotes mitochondrially  
744 dependent type II Fas-induced apoptosis via PEA-15. *Mol Cell Biol* 29, 1222-34.
- 745 QIAO, Z., XIA, C., SHEN, S., CORWIN, F. D., LIU, M., GUAN, R., GRIDER, J. R. & QIAO, L. Y. 2014. Suppression  
746 of the PI3K pathway in vivo reduces cystitis-induced bladder hypertrophy and restores bladder  
747 capacity examined by magnetic resonance imaging. *PloS one* 9, e114536.
- 748 SAIRENJI, T., COLLINS, K. L. & EVANS, D. V. 2017. An Update on Inflammatory Bowel Disease. *Prim Care*  
749 44, 673-692.
- 750 SAMIEA, A., YOON, J. S. J., CHEUNG, S. T., CHAMBERLAIN, T. C. & MUI, A. L. 2020. Interleukin-10  
751 contributes to PGE2 signalling through upregulation of EP4 via SHIP1 and STAT3. *PloS one* 15,  
752 e0230427.

- 753 SHOUVAL, DROR S., BISWAS, A., GOETTEL, JEREMY A., MCCANN, K., CONAWAY, E., REDHU, NARESH S.,  
754 MASCANFRONI, IVAN D., AL ADHAM, Z., LAVOIE, S., IBOURK, M., NGUYEN, DEANNA D., SAMSOM,  
755 JANNEKE N., ESCHER, JOHANNA C., SOMECH, R., WEISS, B., BEIER, R., CONKLIN, LAURIE S., EBENS,  
756 CHRISTEN L., SANTOS, FERNANDA G. M. S., FERREIRA, ALEXANDRE R., SHERLOCK, M., BHAN,  
757 ATUL K., MÜLLER, W., MORA, J. R., QUINTANA, FRANCISCO J., KLEIN, C., MUISE, ALEIXO M.,  
758 HORWITZ, BRUCE H. & SNAPPER, SCOTT B. 2014a. Interleukin-10 Receptor Signaling in Innate  
759 Immune Cells Regulates Mucosal Immune Tolerance and Anti-Inflammatory Macrophage  
760 Function. *Immunity* 40, 706-719.
- 761 SHOUVAL, D. S., OUAHED, J., BISWAS, A., GOETTEL, J. A., HORWITZ, B. H., KLEIN, C., MUISE, A. M. &  
762 SNAPPER, S. B. 2014b. Chapter Five - Interleukin 10 Receptor Signaling: Master Regulator of  
763 Intestinal Mucosal Homeostasis in Mice and Humans. *In: ALT, F. W. (ed.) Advances in Immunology.*  
764 Academic Press. 177-210.
- 765 STENTON, G. R., MACKENZIE, L. F., TAM, P., CROSS, J. L., HARWIG, C., RAYMOND, J., TOEWS, J., CHERNOFF,  
766 D., MACRURY, T. & SZABO, C. 2013a. Characterization of AQX-1125, a small-molecule SHIP1  
767 activator: Part 2. Efficacy studies in allergic and pulmonary inflammation models in vivo. *British*  
768 *journal of pharmacology* 168, 1519-29.
- 769 STENTON, G. R., MACKENZIE, L. F., TAM, P., CROSS, J. L., HARWIG, C., RAYMOND, J., TOEWS, J., WU, J.,  
770 OGDEN, N., MACRURY, T. & SZABO, C. 2013b. Characterization of AQX-1125, a small-molecule  
771 SHIP1 activator: Part 1. Effects on inflammatory cell activation and chemotaxis in vitro and  
772 pharmacokinetic characterization in vivo. *British journal of pharmacology* 168, 1506-18.
- 773 SYDORA, B. C., TAVERNINI, M. M., WESSLER, A., JEWELL, L. D. & FEDORAK, R. N. 2003. Lack of interleukin-  
774 10 leads to intestinal inflammation, independent of the time at which luminal microbial  
775 colonization occurs. *Inflamm Bowel Dis* 9, 87-97.
- 776 TAKEDA, K., CLAUSEN, B. E., KAISHO, T., TSUJIMURA, T., TERADA, N., FORSTER, I. & AKIRA, S. 1999.  
777 Enhanced Th1 activity and development of chronic enterocolitis in mice devoid of Stat3 in  
778 macrophages and neutrophils. *Immunity* 10, 39-49.
- 779 VAN PETEGEM, F., CLARK, K. A., CHATELAIN, F. C. & MINOR, D. L., JR. 2004. Structure of a complex between  
780 a voltage-gated calcium channel beta-subunit and an alpha-subunit domain. *Nature* 429, 671-5.
- 781 VERSTOCKT, B., SMITH, K. G. & LEE, J. C. 2018. Genome-wide association studies in Crohn's disease: Past,  
782 present and future. *Clin Transl Immunology* 7, e1001.
- 783 WEAVER, B. K., BOHN, E., JUDD, B. A., GIL, M. P. & SCHREIBER, R. D. 2007. ABIN-3: a molecular basis for  
784 species divergence in interleukin-10-induced anti-inflammatory actions. *Mol Cell Biol* 27, 4603-16.
- 785 YASUKAWA, H., OHISHI, M., MORI, H., MURAKAMI, M., CHINEN, T., AKI, D., HANADA, T., TAKEDA, K., AKIRA,  
786 S., HOSHIJIMA, M., HIRANO, T., CHIEN, K. R. & YOSHIMURA, A. 2003. IL-6 induces an anti-  
787 inflammatory response in the absence of SOCS3 in macrophages. *Nat Immunol* 4, 551-6.
- 788 ZIGMOND, E., BERNSTEIN, B., FRIEDLANDER, G., WALKER, CATHERINE R., YONA, S., KIM, K.-W., BRENNER,  
789 O., KRAUTHGAMER, R., VAROL, C., MÜLLER, W. & JUNG, S. 2014. Macrophage-Restricted  
790 Interleukin-10 Receptor Deficiency, but Not IL-10 Deficiency, Causes Severe Spontaneous Colitis.  
791 *Immunity* 40, 720-733.
- 792

## Figure 1

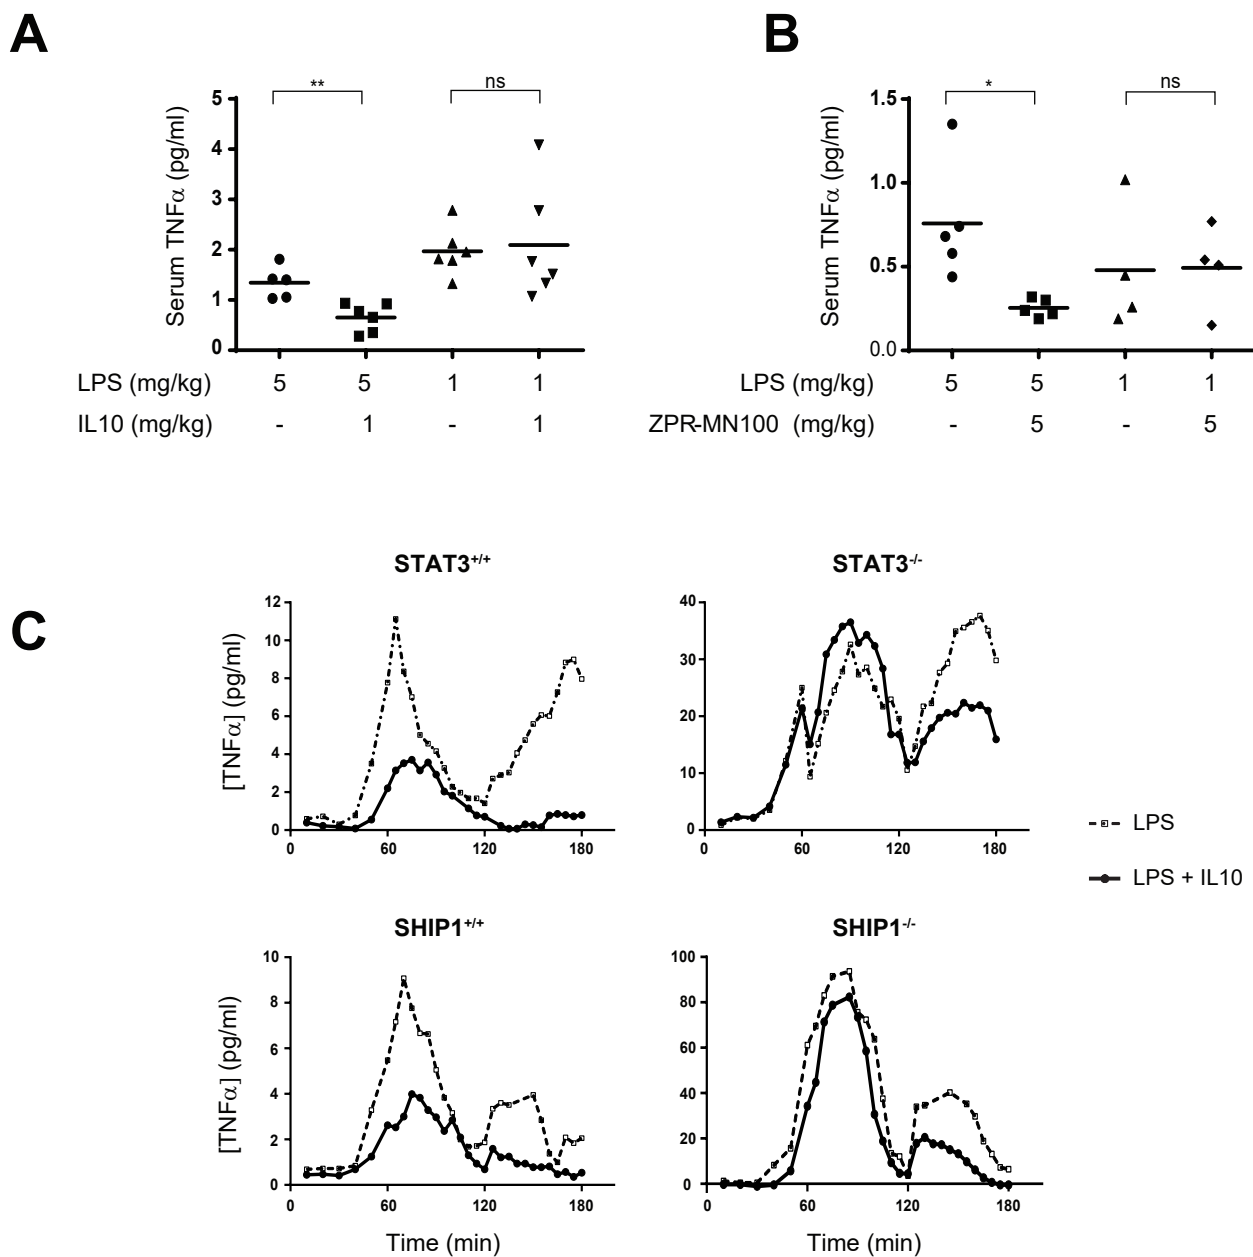

**Figure 1. IL10 uses SHIP1 and STAT3 to inhibit macrophage activation.** Serum TNF $\alpha$  in SHIP1<sup>+/+</sup> or SHIP1<sup>-/-</sup> mice injected intra-peritoneally with LPS, LPS + IL10 (**A**) or LPS + ZPR-MN100 (**B**) at the concentrations indicated for 1 hour. Data represent means of  $n \geq 4$ . \*  $p < 0.05$ , \*\*  $p < 0.01$  when comparing to LPS alone stimulated mice, ns = not significant. (**C**) STAT3<sup>+/+</sup>, STAT3<sup>-/-</sup>, SHIP1<sup>+/+</sup> and SHIP1<sup>-/-</sup> bone marrow derived-macrophages (BMDMs) were stimulated with LPS (dotted line) or LPS + IL10 (solid line) over the course of 180 minutes in a continuous-flow apparatus. Fractions were collected every 5 minutes for measurement of TNF $\alpha$  levels. Data are representative of two independent experiments.

## Figure 2

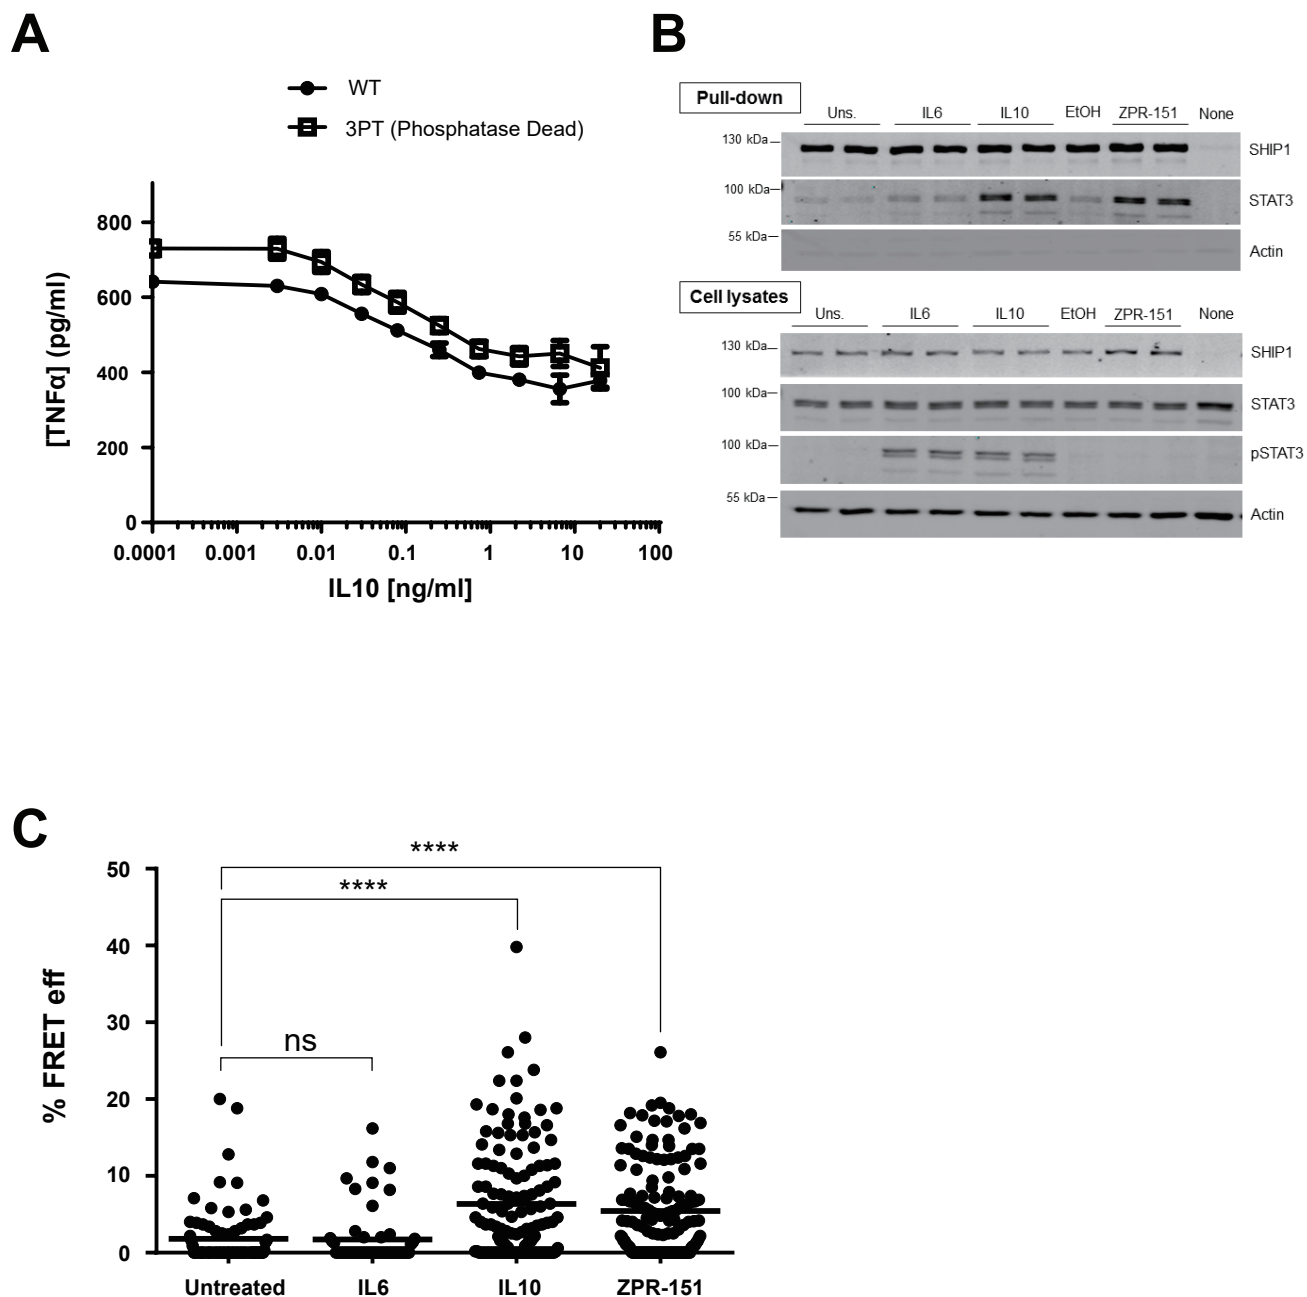

**Figure 2. IL10 induces physical association of SHIP1 and STAT3.** (A) J17 SHIP1<sup>-/-</sup> cells expressing either His<sub>6</sub>-SHIP1 or His<sub>6</sub>-SHIP1 3PT were tested for their ability to be inhibited by IL10 in a LPS-stimulated TNF $\alpha$  production assay. (B) J17 His<sub>6</sub>-SHIP1 cells were stimulated with IL6, IL10 or ZPR-151 for 5 minutes. His<sub>6</sub>-SHIP1 was pulled down using Nickel beads and along with cell lysates probed with SHIP1, STAT3 and phospho-STAT3 antibodies. (C) Single cell FRET analysis of J17 SHIP1<sup>-/-</sup> cells expressing FRET pair fusion constructs, Clover-SHIP1 and mRuby2-STAT3, ‘mock’ stimulated or stimulated with IL6, IL10, ZPR-151 for 1 minute. FRET efficiency was determined using the Acceptor Photobleaching method. Data represent % FRET efficiency of single cells from at least three independent experiments for each treatment (One-Way ANOVA with Tukey’s correction, \*\*\*\* p<0.0001).

## Figure 3

**A**

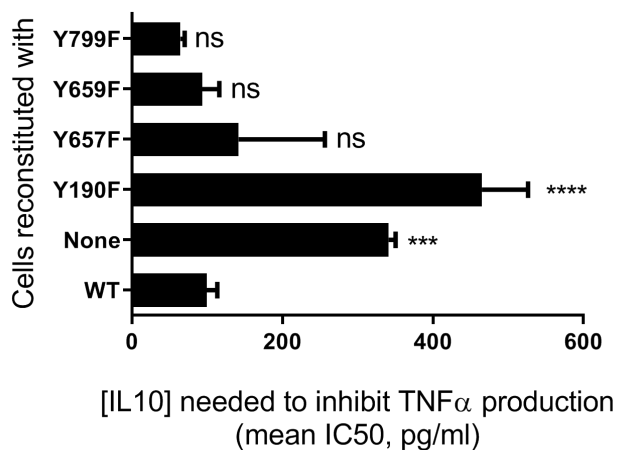

**B**

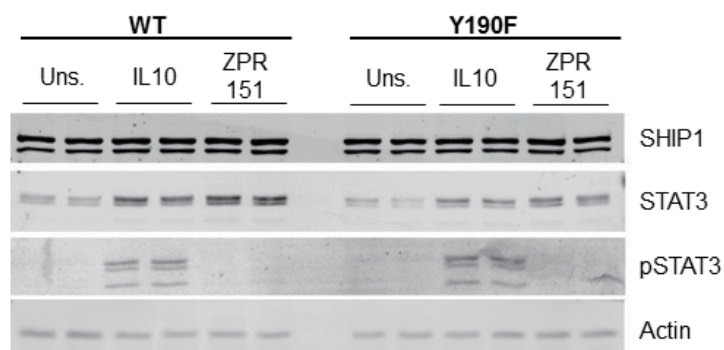

**C**

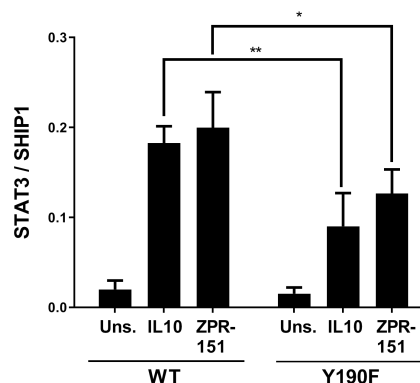

**Figure 3. SHIP1 Y190 is involved in SHIP1 and STAT3 complex formation. (A)** TNF $\alpha$  production of 1 ng/ml LPS + IL10 stimulated J17 SHIP1<sup>-/-</sup> cells reconstituted with WT or mutant SHIP1 or vector (none) determined by ELISA from which IC50 values for IL10 were calculated (One-Way ANOVA with Dunnett's correction \*\*\*\* p < 0.0001). **(B)** Cells expressing either WT or Y190F SHIP1 were stimulated with IL10 or ZPR-151 for 5 minutes. His<sub>6</sub>-SHIP1 was pulled down using Nickel beads and along with cell lysates probed with SHIP1, STAT3 and phospho-STAT3 and actin antibodies. **(C)** The amount of STAT3 protein being pulled down with His<sub>6</sub>-SHIP1 (WT or Y190F) were quantified (Two-Way ANOVA with Sidak's correction, \*\* p < 0.01, \* p < 0.05).



## Figure 4

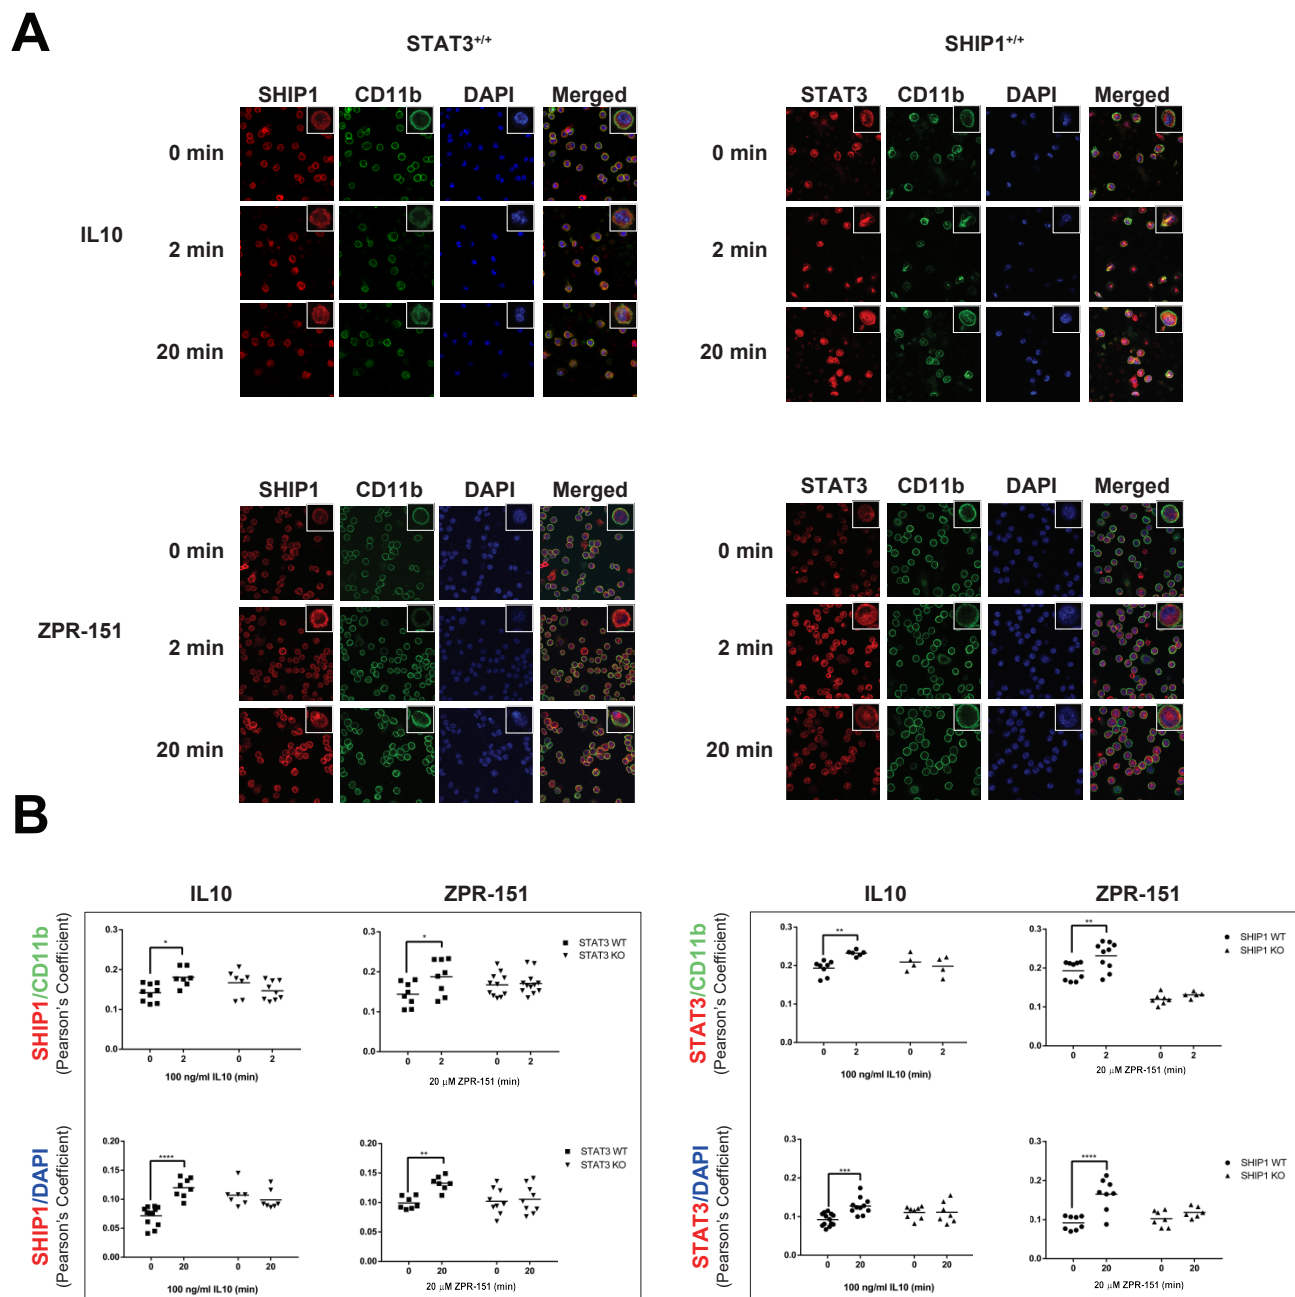

**Figure 4. IL10 induces nuclear translocation of SHIP1 and STAT3.** (A) STAT3<sup>+/+</sup>, and SHIP1<sup>+/+</sup> perimacs were stimulated with IL10 or ZPR-151 for 2 or 20 minutes and stained with CD11b, SHIP1 and STAT3 antibodies and DAPI as indicated. Data for SHIP1<sup>-/-</sup> and STAT3<sup>-/-</sup> perimacs is shown in Figure S1. (B) Pearson's coefficients were calculated to show the degree of overlap of SHIP1 or STAT3 with the membrane marker CD11b or DNA marker DAPI. Data represent Pearson's coefficients for individual fields of cells from at least two independent experiments in each cell type (Two-Way ANOVA with Sidak's correction, \*\*\*\* p<0.0001, \*\*\* p<0.001, \*\* p<0.01, \* p<0.05).

## Figure 5

**A**

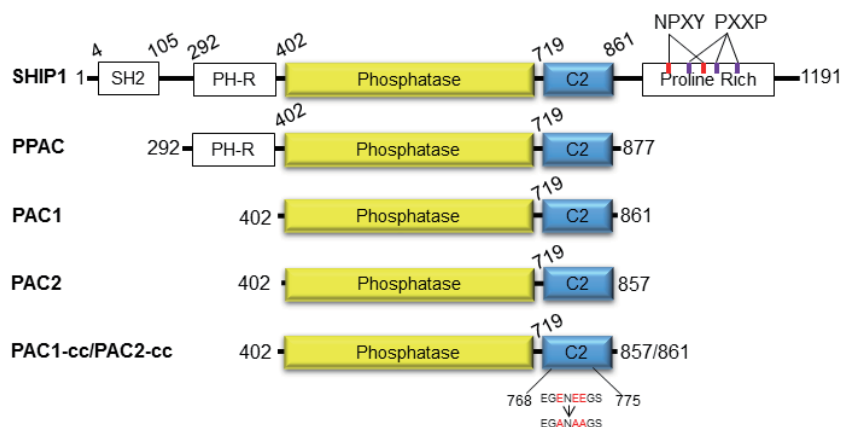

**B**

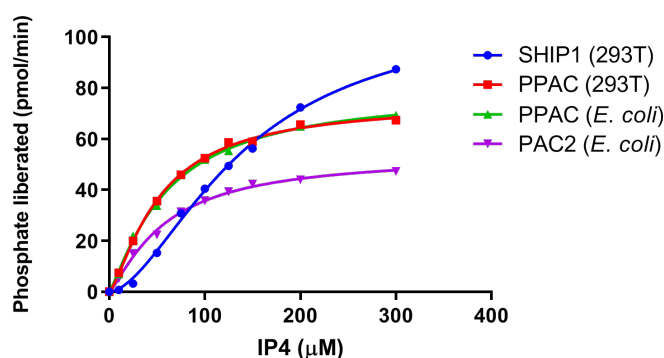

**C**

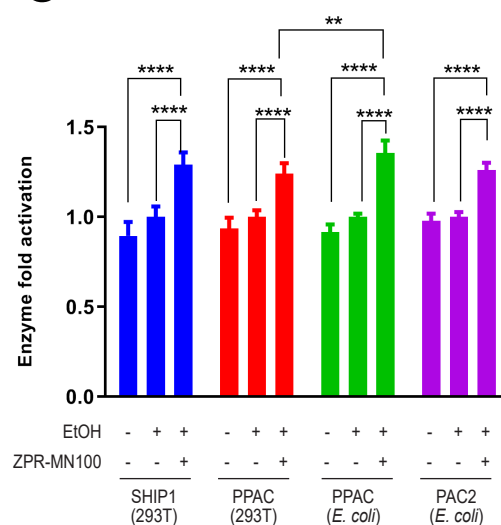

| Enzyme                  | $K_{cat}$ ( $\text{min}^{-1}$ ) | $K_m$ ( $\mu\text{M}$ ) | $K_{cat}/K_m$<br>( $\text{pmol PO}_4/\text{min}/\text{pmol}$<br>enzyme / $\mu\text{M}$ substrate) |
|-------------------------|---------------------------------|-------------------------|---------------------------------------------------------------------------------------------------|
| SHIP1 (293T)            | 1290 +/- 420                    | 148 +/- 9               | 8.7 +/- 3.3                                                                                       |
| PPAC (293T)             | 1032 +/- 413                    | 67 +/- 34               | 16.0 +/- 1.7                                                                                      |
| PPAC ( <i>E. coli</i> ) | 1020 +/- 203                    | 65 +/- 8                | 15.5 +/- 1.3                                                                                      |
| PAC2 ( <i>E. coli</i> ) | 708 +/- 355                     | 66 +/- 22               | 10.3 +/- 3.1                                                                                      |

**Figure 5. PPAC, PAC1 and PAC2 have similar enzymatic activity as full length SHIP1. (A)** Schematic diagram of the different SHIP1 truncation constructs. PPAC consists of PH-R domain, phosphatase and C2 domain (residues aa 293-877) PAC1 and PAC2 consists of phosphatase and C2 domain (residues aa 402-861 and aa 402-857 respectively). PAC1-cc and PAC2-cc contain surface entropy reduction mutations in C2 domain (E770A, E772A, E773A). This cluster of residues were identified using the the SERp server (<http://services.mbi.ucla.edu/SER/intro.php>). **(B)** Enzyme catalytic initial velocities were determined at the indicated concentrations of IP4.  $K_{cat}$  and  $K_m$  values were calculated using GraphPad software **(C)** Ability of ZPR-MN100 to stimulate phosphatase activity in full length SHIP1, PPAC and PAC (Two-Way ANOVA with Tukey correction for multiple comparisons, \*\* $p < 0.01$ , \*\*\*\*  $p < 0.0001$ ).



## Figure 6

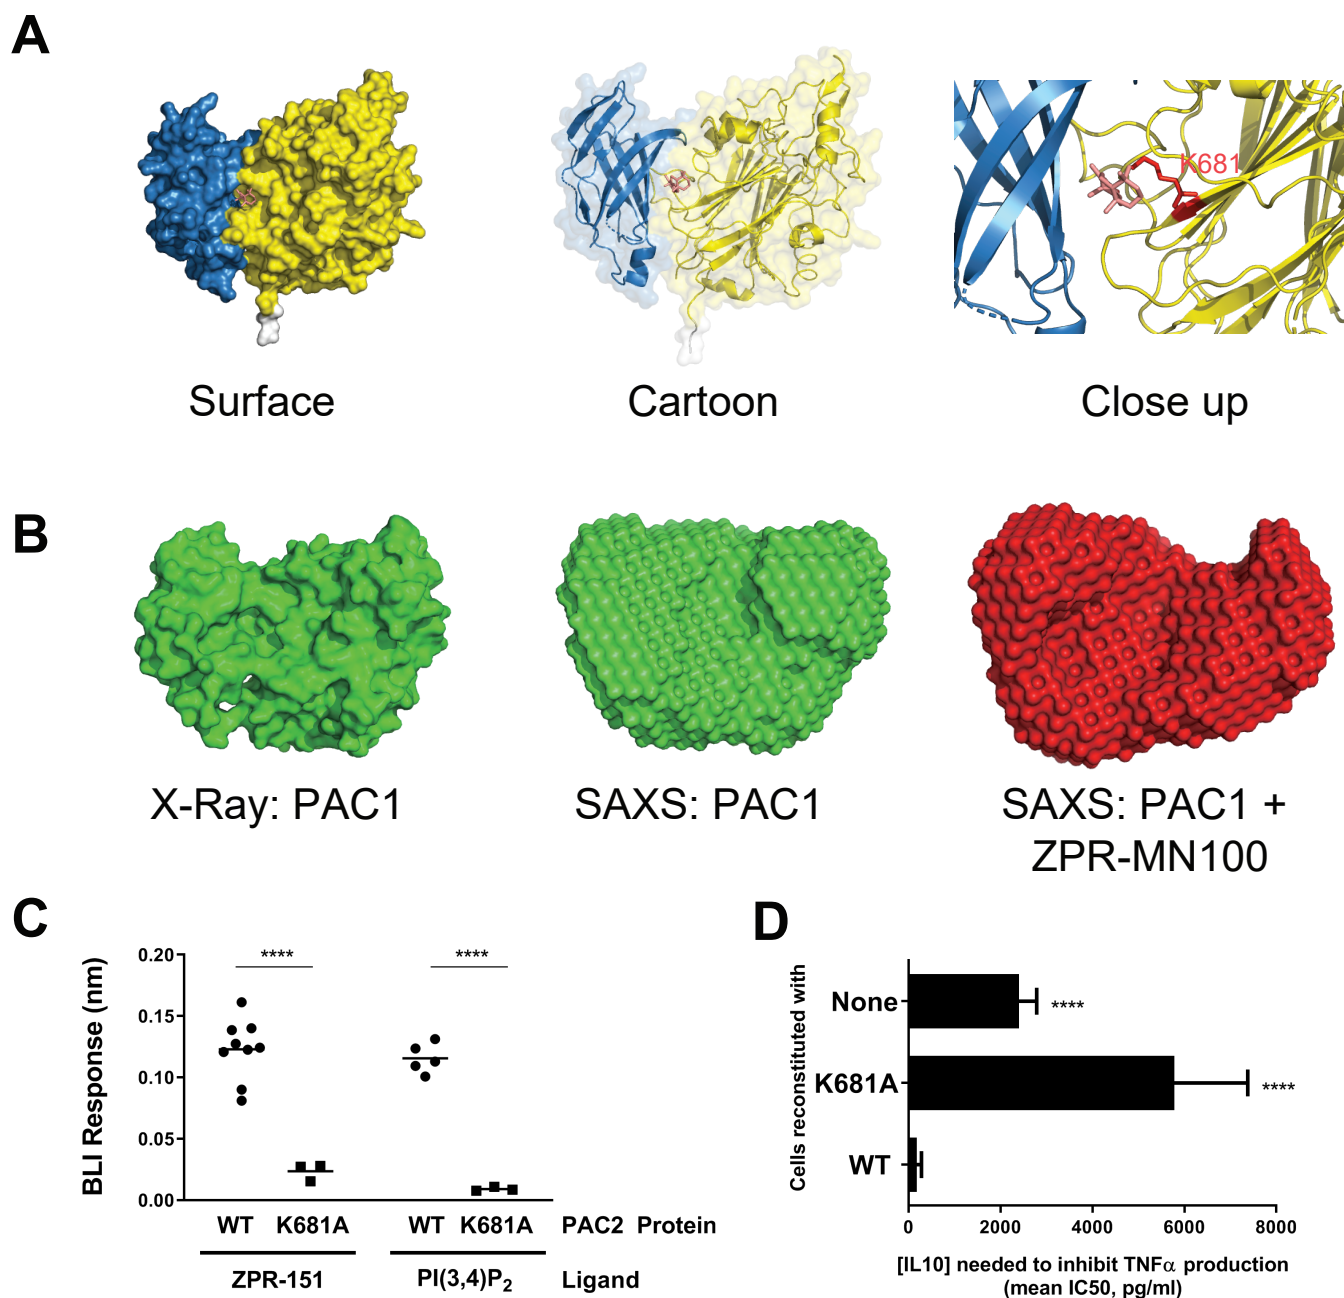

**Figure 6. SHIP1 undergoes conformational change upon allosteric regulator binding. (A)** Model of PAC2 based on crystallography data. The predicted binding pocket for the ZPR-MN100 (pink stick diagram) is located in the interface between C2 (blue) and phosphatase (yellow) domains. The binding pocket has amino acid residues K681 in close proximity with ZPR-MN100. **(B)** SAXS model of PAC1 in the absence of (apo-PAC1) and presence of liganded ZPR-MN100. **(C)** Bio-layer interferometry (BLI) data of PAC2 WT and K681A loaded sensors exposed to either 20  $\mu$ M of ZPR-151 or PI(3,4)P<sub>2</sub>. \*\*\*\* p<0.0001 comparing WT PAC2 and K681A (Unpaired Student's t-test) **(D)** TNF $\alpha$  production of 10 ng/ml LPS + IL10 stimulated cells reconstituted with WT or K681A SHIP1 or none (SHIP1 KO) determined by ELISA from which IC<sub>50</sub> values for IL10 were calculated. \*\*\*\* p<0.0001 when comparing to cells reconstituted with WT SHIP1 (Unpaired Student's t-test). See also Figure S2 and Table S1.

## Figure 7

**A**

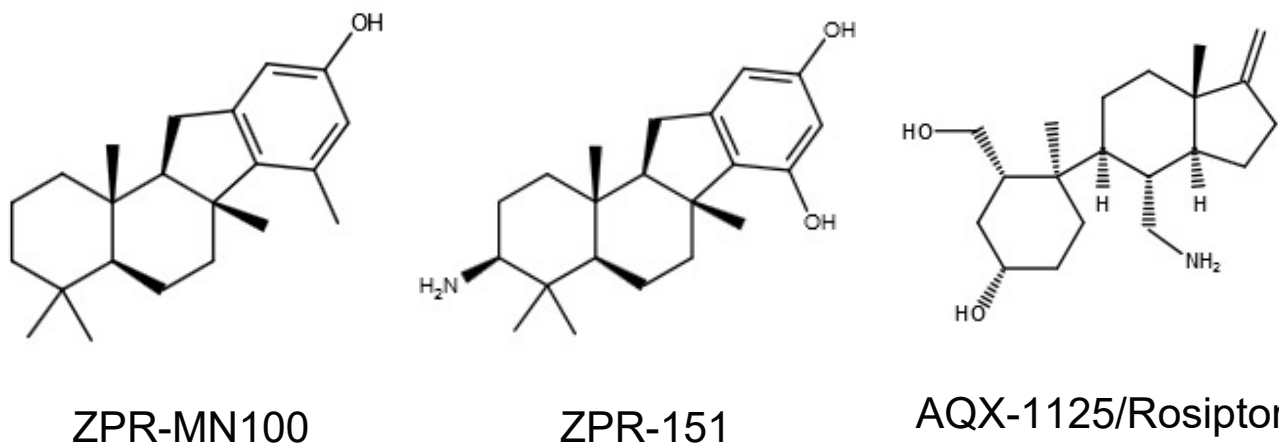

**B**

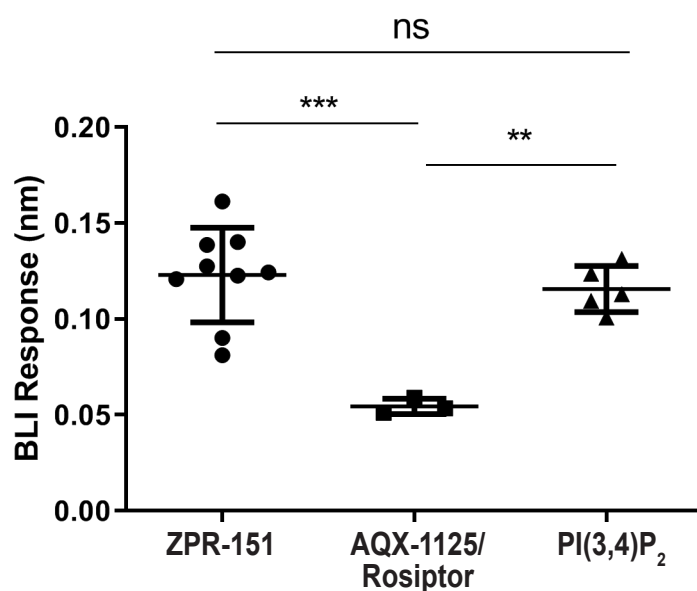

**Figure 7. AQX-1125/Rosiptor binding to PAC2 is weak compared to ZPR-151 and PI(3,4)P<sub>2</sub>.** (A) Structures of ZPR-MN100 and its derivative ZPR-151, and AQX-1125/Rosiptor. (B) Representative Bio-layer interferometry (BLI) curves for binding of 20  $\mu\text{M}$  ZPR-151, AQX-1125 and PI(3,4)P<sub>2</sub> to wild-type (WT) PAC2. Each data point indicates data from an independent biosensor (One-Way ANOVA with Tukey's correction \*\*\* p < 0.001, \*\* p < 0.01). See also Figure S2.
